# Supplementary material
Source: PubMed Central journal article supplement (PMC11156187)
Supplement: NEJMoa2311330_appendix.pdf [file NEJMoa2311330_appendix.pdf]

## Supplementary Appendix

Supplement to: Hampshire A, Azor A, Atchison C, et al. Cognition and memory after Covid-19 in a large community sample. *N Engl J Med* 2024;390:806-818. DOI: 10.1056/NEJMoa2311330

This appendix has been provided by the authors to give readers additional information about the work.

## **Supplemental appendix**

This appendix has been provided by the authors to give the reader additional information about their work.

Supplement to Hampshire et al. Cognition and Memory after Covid-19 in a Large Community Sample

## Cognition and Memory after Covid-19 in a Large Community Sample

3. Investigators
4. Supplemental methods. Cognitive task designs
6. Figure S1. Study and cognitive task designs
7. Figure S2. Estimates from analyses of associations of global cognitive score with illness duration stratified by variant period
8. Figure S3. Relationship of global cognitive score with symptoms
10. Table S1. Questionnaire transcript
14. Table S2a. Normative model estimates for primary summary scores
16. Table S2b. Normative model estimates for secondary summary scores
18. Table S2c. Normative model estimates for memory error types
20. Table S3. Factors used in propensity score matching analyses
21. Table S4a. Demographics and group distributions relative to the sampling frame
22. Table S4b. Selection bias for people with subjective cognitive symptoms
22. Table S4c. Demographics and group distributions for participants who started and completed the cognitive study
24. Table S4d. Representativeness of study participants
25. Table S5. Numbers of participants and linear model estimates (SD units) of global cognitive score per infection onset date
26. Table S6. Probability distributions for global cognitive score by variant period, illness duration and emergency department visit or hospital admission / other medical assistance
27. Table S7. Linear modelling of main effects in relation to global cognitive score in SD units
29. Table S8. Stepwise regression conducted with all main effects and 2-way interactions
30. Table S9. Main effect of global cognitive score in SD units and 95% Confidence Intervals of duration of symptoms for each variant period relative to the reference of No-Covid-19
31. Table S10. Contrasting global cognitive performance (in SD units with 95% Confidence Intervals) for each cell of the variant period \* illness duration factorial with No-Covid-19 after propensity score matching
33. Table S11. Contrasting global cognitive performance (in SD units with 95% Confidence Intervals) when propensity score matching the No-Covid-19 group, or those who did not seek medical assistance, with those who visited the emergency department or were admitted to hospital, or sought other medical assistance
34. Table S12. Propensity score matching analysis for people who had different numbers of valid vaccine doses prior to their worst (longest duration) Covid-19 illness and whose first two doses were AstraZeneca vs Pfizer
35. Table S13. Propensity score matching analysis for people who had one Covid-19 episode vs multiple episodes
36. Table S14. Associations of specific task summary scores (SD units) with post-Covid covariates
39. Table S15. Objectively measured correlates of recent subjective memory symptoms (poor memory), mean difference in task score (SD units)
41. Table S16. Objectively measured correlates of “brain fog”, mean difference in task score (SD units)
43. Table S17. Contrasting global cognitive score (SD units) for presence vs absence of individual symptoms in resolved and persistent post-Covid cases
45. Table S18. Associations with global cognitive score (SD units) after excluding people who were vaccinated prior to their worst (longest duration) Covid-19 illness
45. Table S19. Associations with global cognitive score (SD units) after excluding the No-Covid-19 group
46. Table S20. Analysis of associations with global cognitive score (SD units) when including either people who did or did not report recent (in the past two weeks) cognitive symptoms (poor memory or “brain fog”)
47. Table S21. Associations with global cognitive score (SD units) when excluding people where education level was unknown
48. Table S22. Associations with global cognitive score (SD units) when including suspected but unconfirmed Covid-19 as a separate group
49. References

**Investigators**

Adam Hampshire, Ph.D.

Adriana Azor, Ph.D.

Christina Atchison, Ph.D.

William Trender, M.Res.

Peter J. Hellyer, Ph.D.

Valentina Giunchiglia, M.Sc.

Masud Husain, Ph.D.

Graham S. Cooke, Ph.D.

Emily Cooper, M.A.

Adam Lound, M.Sc.

Christl A. Donnelly, Ph.D.

Marc Chadeau-Hyam, Ph.D.

Helen Ward, Ph.D.

Paul Elliott, Ph.D.

## Supplemental methods. Cognitive task designs

**Immediate Memory** - 20 images are displayed with an encoding time of 2000ms and inter stimulus interval of 500ms. After the full sequence is finished, each stimulus is then presented in turn within a grid of 7 distractors. The distractors are categorised by how similar they are to the stimulus along 3 dimensions. The dimensions are:

- Item - Whether the image is of the same item as the target.
- Precision - Whether the image is of the same pose or artistic style as the target.
- Mis-binding - Whether the image is flipped left or right.

The main outcome measure is the number of points accrued, where points are awarded for each trial as incorrect item = 0, correct item = 1, correct item + precision = 2, correct item, precision and binding = 3, summed across trials. Secondary scores include error types and median response times.

**2D Mental Manipulation** - A target grid of coloured blocks is displayed above a set of 4 similar grids of colored blocks. 3 of the grids have been subtly altered from the target and the 4th is identical to the target. The grids have all been randomly oriented at 90, 180 or 270 degrees from the target grid. The volunteer must click the grid that is identical to the target as quickly and accurately as possible. They have 3 minutes to complete as many trials as they can. The main outcome measure is the total number of correctly identified matches divided by the total number of trials completed. Secondary score is median response time.

**Spatial Working Memory** - A grid of 16 squares is presented. A sequence of these squares lights up, with each square lit up for 1500ms with an inter-stimulus interval of 0ms. The volunteer must remember the sequence and when it is finished, must click the sequence of squares in the correct order. If the volunteer gets a trial correct, then the number of squares in the sequence increases by 1. If the volunteer fails on a sequence of the same number of items 3 times in a row, the game ends. The main outcome measure is the maximum length sequence correctly remembered by the volunteer. Secondary score is median response time.

**Spatial Planning (Tower of London)** - The volunteer is presented with 10 sets of 2 rows of pegs with colored rings on them. They must identify the minimum number of moves that it would take to transform the top row of pegs to the same configuration as the bottom row of pegs. They must do this in their head and cannot use trial and error to move the rings around. The main outcome measure is the total number of correct trials divided by the total number of trials. Secondary score is median response time.

**Verbal Analogical Reasoning** - The volunteer is presented with a set of comparative analogies, for example "light is to heavy as fast is to slow". The volunteer must work out if the comparison is correct. In the given example, this comparison is correct as they are both opposites of each other. An example of an incorrect analogical comparison would be "human is to ape as fast is to slow". The volunteer must complete as many comparisons as possible in 3 minutes as accurately as possible. The main outcome measure is the total number of correct trials divided by the total number of completed trials. Secondary score is median response time.

**Word Definitions** - The volunteer is presented with a series of trials on which a word is displayed alongside four possible definitions. The words are sampled to give the same balance of variability of frequency of use in the general population. The volunteer must indicate which of the definitions matches the currently presented word, responding as quickly and accurately as they can. If they do not know the definition they must make their best guess. The volunteer must complete a fixed number of trials as quickly and accurately as they can. The main outcome measure is the total

number of correct trials. The secondary score is median response time on trials where their answer is correct.

**Information Sampling** - The volunteer must decide which out of two colors they judge to be the most common in an unseen bag of beads. They select one bead at a time until they have sufficient evidence to make that decision. If they choose the correct color, then they are awarded points. The more beads that are selected, the fewer points they are awarded. However, certainty in their decision increases the more beads that they select. Therefore, they must balance higher reward against higher certainty. The task completes after 15 trials. The main outcome measure is the number of points awarded. Secondary outcome measures include mean number of selections before decision, percent correct decisions and mean response time when selecting beads.

**Delayed Memory** - The volunteer is presented with the same task as the Object Memory (Immediate Memory) task described above, however the encoding period is removed. This means the volunteer must remember the stimuli from the beginning of the battery. The main outcome measure is the total number of points accrued as described in the Object Memory (Immediate Memory). Secondary scores include error types and median response times.

## A. Participant Flow

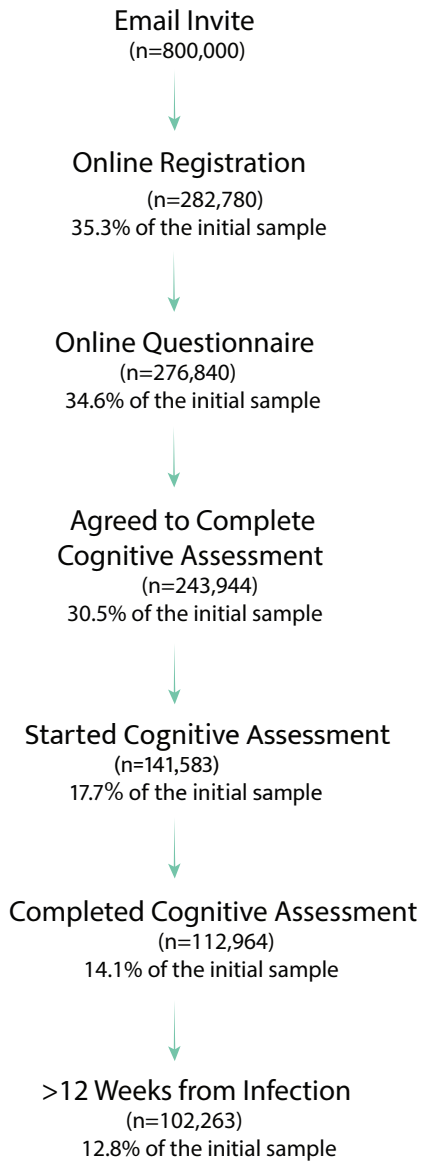

## B. Design of Cognitive Assessment

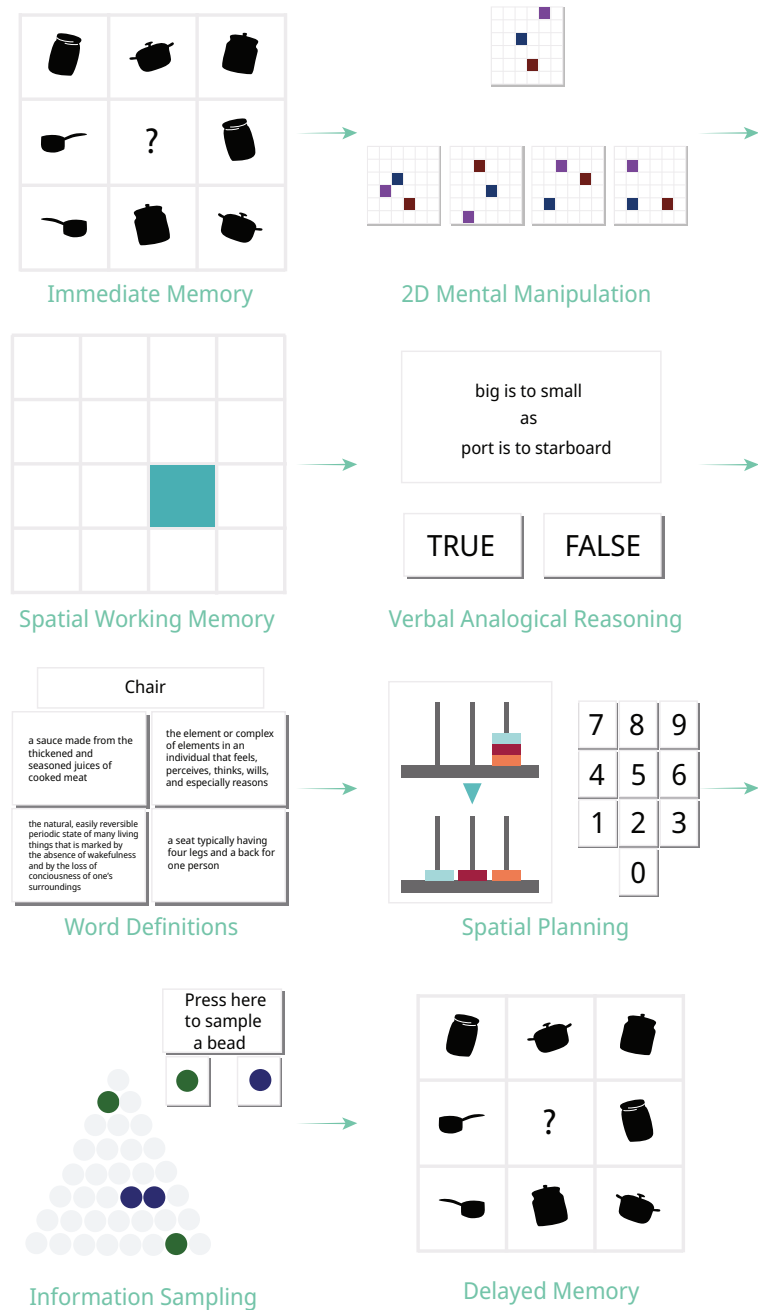

**Figure S1. Study and cognitive task designs**

**A.** The steps in recruitment to the study from the REACT cohort. **B.** The sequence of 8 cognitive tasks undertaken by participants.

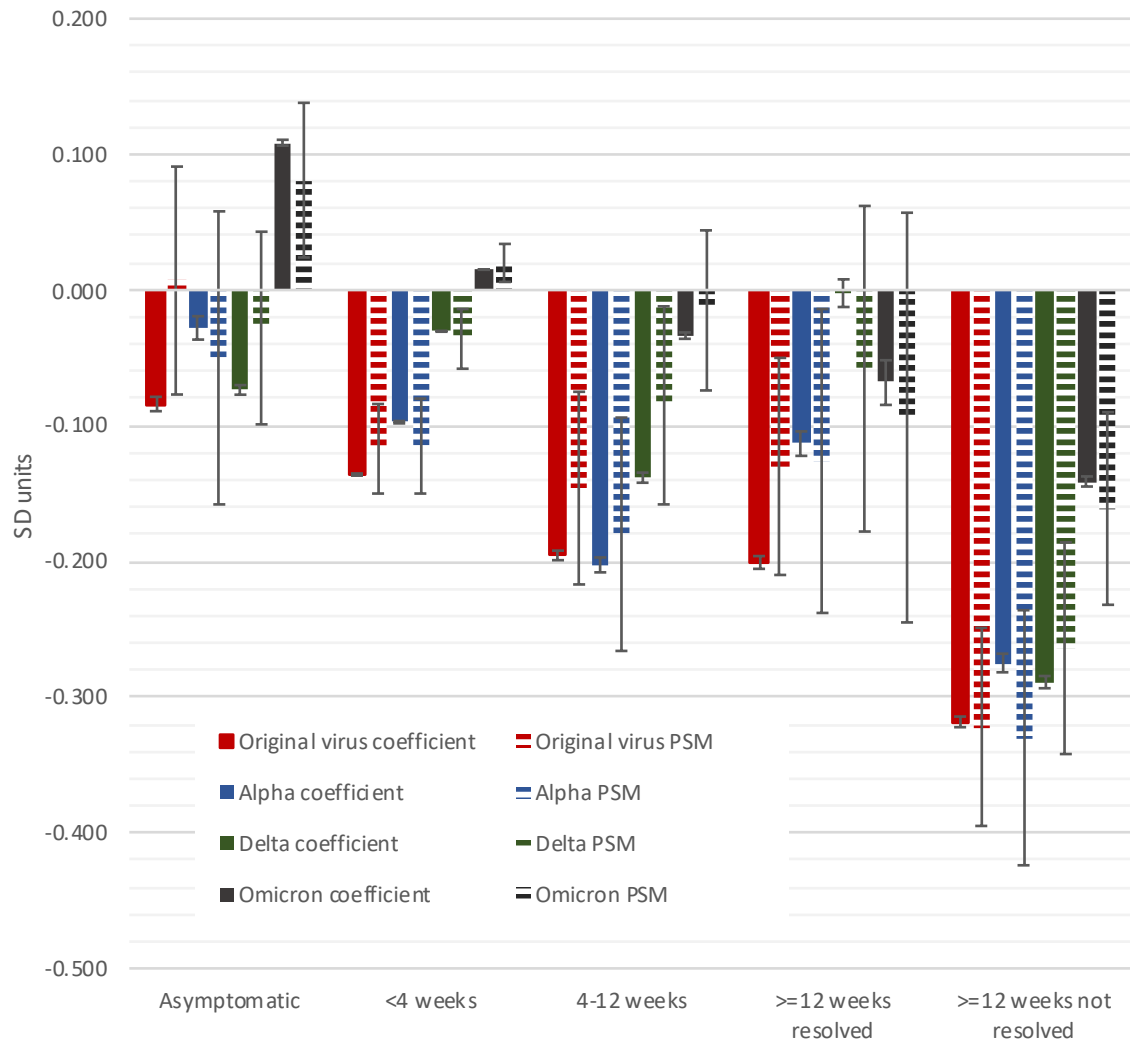

**Figure S2. Estimates from analyses of associations of global cognitive score with illness duration stratified by variant period**

*Solid bars show coefficient estimates from the linear regression model, relative to the No-Covid-19 group, stratified by variant period. Adjacent patterned bars show corresponding mean differences from the propensity score matched (PSM) analysis, matching to the No-Covid-19 group by demographic factors and pre-existing conditions separately for each combination of illness-duration and variant period. Error bars are the 95% confidence interval.*



S3A. For people assessed at least 12 weeks since their Covid-19 infection onset, the mean differences in global cognitive scores between those indicating presence minus those indicating absence of individual symptoms as part of their illness.

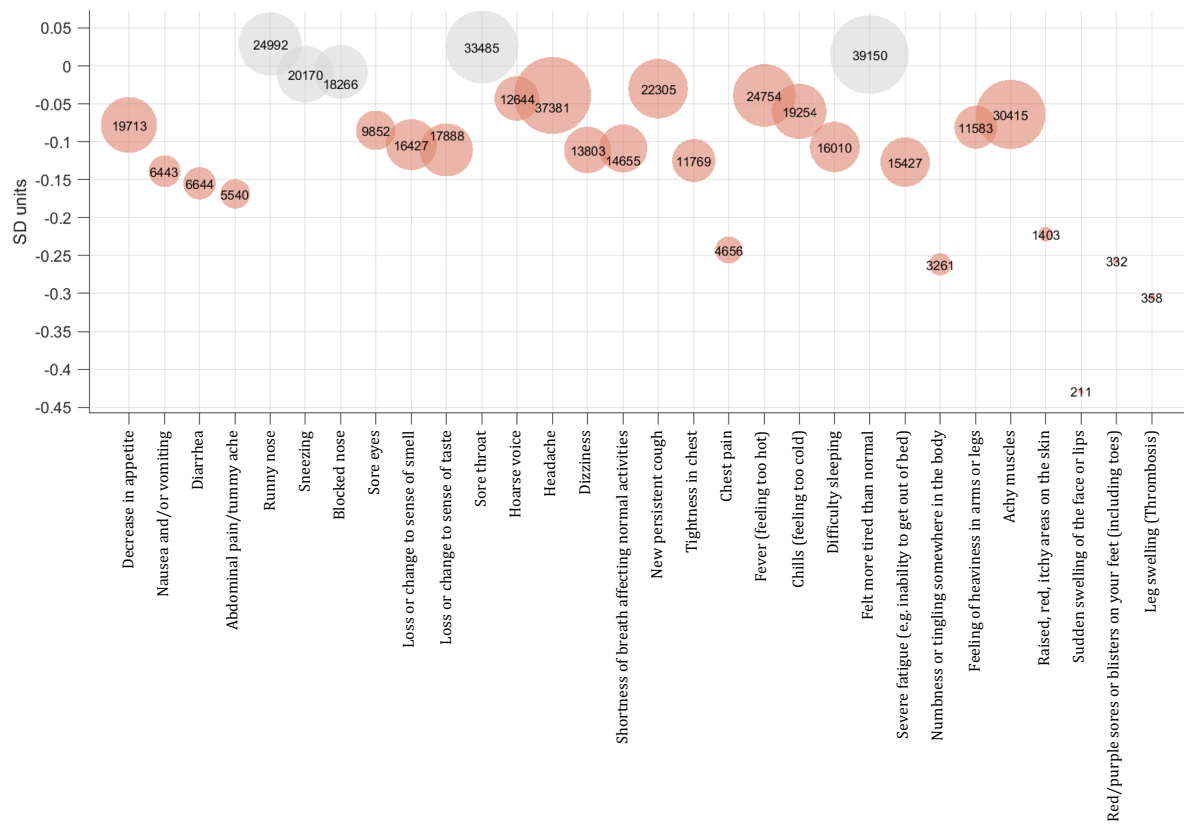

S3B. For ongoing persistent Covid-19 cases, the mean difference in global cognitive scores between those indicating presence minus those indicating absence of individual symptoms within the past two weeks.

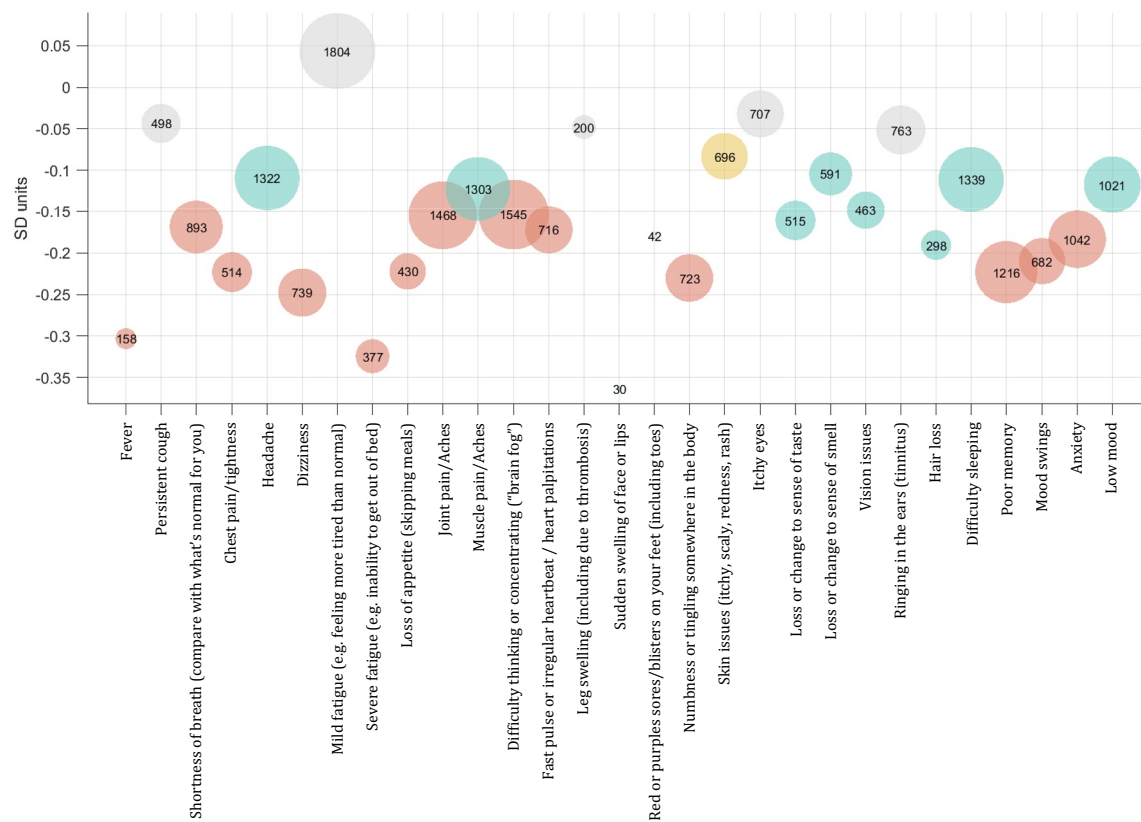

**Figure S3. Relationship of global cognitive score with symptoms**

**A.** For people whose illness was at least 12 weeks prior to cognitive assessment, comparing global cognitive score between those answering yes vs. no to each individual symptom in response to the question “Which of the following symptoms were part of your Covid-19 illness?”. **B.** For people with ongoing persistent symptoms, comparing global cognitive score between those answering yes vs. no to each individual symptom in response to the question “Indicate which persistent symptoms (lasting more than 12 weeks) you think may be linked to your having had Covid-19?” Size of circles is proportional to number of participants reporting the symptom, numbers are also presented. Position represents differences in the mean between those answering yes vs. no in standard deviation units. Color represents whether the difference falls below the lower 99.9% (pink), 95.0% (blue) or 90.0% (yellow) confidence interval unadjusted for multiple comparisons.

## Table S1. Questionnaire transcript

Full questionnaire transcripts for REACT are available on this link:  
<https://www.imperial.ac.uk/medicine/research-and-impact/groups/react-study/for-researchers/react-long-covid-materials/>

Specific questionnaire items analysed in this study were phrased as below.

|                                                                                                                                                                                                                                                                                                |                                                                                                                                                                                                                                                                                                                                                                                                                                                                                                                                                                                                                                                                                                                                                                                                               |
|------------------------------------------------------------------------------------------------------------------------------------------------------------------------------------------------------------------------------------------------------------------------------------------------|---------------------------------------------------------------------------------------------------------------------------------------------------------------------------------------------------------------------------------------------------------------------------------------------------------------------------------------------------------------------------------------------------------------------------------------------------------------------------------------------------------------------------------------------------------------------------------------------------------------------------------------------------------------------------------------------------------------------------------------------------------------------------------------------------------------|
| <p>In the last two weeks, that is since &lt;DAY/MONTH&gt;, have you experienced any of the following symptoms? Please include any symptom you have experienced over the last two weeks, including those that have resolved or lasted only a few days. Please select all that apply.</p>        | <ol style="list-style-type: none"> <li>1. Fever</li> <li>2. Persistent cough</li> <li>3. Shortness of breath (compare with what's normal for you)</li> <li>4. Chest pain/tightness</li> <li>5. Headache</li> <li>6. Dizziness</li> <li>7. Mild fatigue (e.g. feeling more tired than normal)</li> <li>8. Severe fatigue (e.g. inability to get out of bed)</li> <li>9. Loss of appetite (skipping meals)</li> <li>10. Joint pain/Aches</li> <li>11. Muscle pain/Aches</li> <li>12. Difficulty thinking or concentrating ("brain fog")</li> <li>13. Fast pulse or irregular heartbeat / heart palpitations</li> <li>14. None of these – FIXED CODE (EXCLUSIVE)</li> <li>15. Prefer not to say – FIXED CODE (EXCLUSIVE)</li> </ol>                                                                              |
| <p>How about these? Have you experienced any of the following in the last two weeks, that is since &lt;DAY/MONTH&gt;? Please include any symptom you have experienced over the last two weeks, including those that have resolved or lasted only a few days. Please select all that apply.</p> | <ol style="list-style-type: none"> <li>1. Leg swelling (including due to thrombosis)</li> <li>2. Sudden swelling of face or lips</li> <li>3. Red or purple sores/blisters on your feet (including toes)</li> <li>4. Numbness or tingling somewhere in the body</li> <li>5. Skin issues (itchy, scaly, redness, rash)</li> <li>6. Itchy eyes</li> <li>7. Loss or change to sense of taste</li> <li>8. Loss or change to sense of smell</li> <li>9. Vision issues</li> <li>10. Ringing in the ears (tinnitus)</li> <li>11. Hair loss</li> <li>12. Difficulty sleeping</li> <li>13. Poor memory</li> <li>14. Mood swings</li> <li>15. Anxiety</li> <li>16. Low mood</li> <li>17. Other (please write in) (Free text box max 200 characters)</li> <li>18. None of these</li> <li>19. Prefer not to say</li> </ol> |
| <p>Which symptom(s), if any, started after 1 January 2020? [DISPLAY LIST OF SYMPTOMS AS ABOVE SO THEY CAN BE SELECTED]</p>                                                                                                                                                                     |                                                                                                                                                                                                                                                                                                                                                                                                                                                                                                                                                                                                                                                                                                                                                                                                               |
| <p>Have you ever had a coronavirus vaccine?</p>                                                                                                                                                                                                                                                | <ol style="list-style-type: none"> <li>1. Yes</li> <li>2. No</li> <li>3. Don't know</li> </ol>                                                                                                                                                                                                                                                                                                                                                                                                                                                                                                                                                                                                                                                                                                                |
| <p>Most of the vaccines require more than one dose which are given as separate injections some time apart. How many doses (injections) have you had so far?</p>                                                                                                                                | <ol style="list-style-type: none"> <li>1. One</li> <li>2. Two</li> <li>3. Three</li> <li>4. More than three</li> </ol>                                                                                                                                                                                                                                                                                                                                                                                                                                                                                                                                                                                                                                                                                        |

|                                                                                                                                                                                                        |                                                                                                                                                                                                                                                                                                                                                                                                                                                                                                                           |
|--------------------------------------------------------------------------------------------------------------------------------------------------------------------------------------------------------|---------------------------------------------------------------------------------------------------------------------------------------------------------------------------------------------------------------------------------------------------------------------------------------------------------------------------------------------------------------------------------------------------------------------------------------------------------------------------------------------------------------------------|
| Do you think that you have or have had Covid-19?                                                                                                                                                       | <ul style="list-style-type: none"> <li>1. Yes</li> <li>2. No</li> <li>3. Not sure</li> <li>4. Prefer not to say</li> </ul>                                                                                                                                                                                                                                                                                                                                                                                                |
| Do you think you have had Covid-19 more than once?                                                                                                                                                     | <ul style="list-style-type: none"> <li>1. Yes</li> <li>2. Not sure</li> <li>3. No</li> <li>4. Prefer not to say</li> </ul>                                                                                                                                                                                                                                                                                                                                                                                                |
| How many times do you think you have had Covid-19?                                                                                                                                                     |                                                                                                                                                                                                                                                                                                                                                                                                                                                                                                                           |
| When did your first symptoms start when you had Covid-19 IF < HADCovid = 1 AND HADCovidTIMES =1<the first time> (as best as you can remember)?                                                         | DAY/MONTH/YEAR                                                                                                                                                                                                                                                                                                                                                                                                                                                                                                            |
| When did your symptoms finish when you had Covid-19 [IF < HADCovid = 1 AND HADCovidTIMES =1<the first time>] (as best as you can remember)?                                                            | DAY/MONTH/YEAR<br>I still have symptoms                                                                                                                                                                                                                                                                                                                                                                                                                                                                                   |
| What kind of medical attention, if any, did you access for your illness when you IF CovidA2=1 had; IF CovidA2=2 or 3 thought you had Covid-19 the most recent time?<br>Please select all that apply.   | <ul style="list-style-type: none"> <li>1. None</li> <li>2. Contacted NHS 111, by phone or online</li> <li>3. Visited pharmacist</li> <li>4. Consulted GP/practice nurse over the phone or online</li> <li>5. Consulted GP/practice nurse face to face</li> <li>6. Walk-in centre</li> <li>7. Accident and Emergency</li> <li>8. Hospital admission</li> <li>9. Hospital admission: intensive care unit</li> <li>10. Other, please write in ..... [free text]</li> </ul>                                                   |
| Thinking about [IF < HADCovid = 1 AND HADCovidTIMES =1 all the times you had] [HADCovid = 1 AND HADCovidTIMES =2, 3 OR 4 the time you had] Covid-19, did any of your symptoms last more than 12 weeks? | <ul style="list-style-type: none"> <li>1. Yes</li> <li>2. No</li> <li>3. Don't know</li> </ul>                                                                                                                                                                                                                                                                                                                                                                                                                            |
| Do you have any of the following (or do any of the following apply to you)? Please select all that apply.                                                                                              | <ul style="list-style-type: none"> <li>1. Organ transplant recipient</li> <li>2. Diabetes (type I or II)</li> <li>3. Heart disease or heart problems such as heart failure</li> <li>4. Hypertension (high blood pressure)</li> <li>5. Stroke</li> <li>6. Kidney failure (kidneys do not work well)</li> <li>7. Liver disease</li> <li>8. Anaemia</li> <li>9. Allergy (eczema, hay fever, rhinitis)</li> <li>10. None of these – FIXED CODE (EXCLUSIVE)</li> <li>11. Prefer not to say – FIXED CODE (EXCLUSIVE)</li> </ul> |

How about these? Do you have any of the following (or do any of the following apply to you)? Please select all that apply.

1. Asthma
2. Other condition affecting lungs (such as chronic obstructive lung disease (COPD), bronchitis or emphysema)
3. Cancer
4. Fibromyalgia
5. Epilepsy
6. Other condition affecting the brain and nerves (e.g. Dementia, Parkinson's, Multiple Sclerosis, Myasthenia Gravis)
7. Osteoarthritis
8. A weakened immune system/reduced ability to deal with infections (as a result of a disease or treatment)
9. Hepatitis, tuberculosis or other chronic infection.
10. None of these – FIXED CODE (EXCLUSIVE)
11. Prefer not to say – FIXED CODE (EXCLUSIVE)

How about these? Do you have any of the following? Please select all that apply.

1. Dementia
  2. Anxiety
  3. Depression
  4. Any other psychiatric condition e.g. bipolar disorder, schizophrenia, anorexia or bulimia
  5. Rheumatoid arthritis
  6. Hypothyroidism (underactive thyroid gland)
  7. Hyperthyroidism (overactive thyroid gland)
  8. Addison's or Cushing's disease (poor functioning of the adrenal glands)
  9. Sleep apnoea/ narcolepsy
  10. Any other serious illness
- Please write in: [free text] -\_[FIXED CODE]
11. None of these – FIXED CODE (EXCLUSIVE)
  12. Prefer not to say – FIXED CODE (EXCLUSIVE)

Which of the following symptoms were part of your Covid-19 illness? Please select all the symptoms you had, whether or not you saw a doctor.

1. Decrease in appetite
2. Nausea and/or vomiting
3. Diarrhoea
4. Abdominal pain/tummy ache
5. Runny nose
6. Sneezing
7. Blocked nose
8. Sore eyes
9. Loss or change to sense of smell
10. Loss or change to sense of taste
11. Sore throat
12. Hoarse voice
13. Headache
14. Dizziness
15. None of these –FIXED CODE (EXCLUSIVE)
16. Prefer not to say –FIXED CODE (EXCLUSIVE)

Which of the following symptoms were part of your Covid-19 illness? Please select all the symptoms you had, whether or not you saw a doctor.

1. Shortness of breath affecting normal activities
2. New persistent cough
3. Tightness in chest
4. Chest pain
5. Fever (feeling too hot)
6. Chills (feeling too cold)
7. Difficulty sleeping
8. Felt more tired than normal
9. Severe fatigue (e.g. inability to get out of bed)
10. Numbness or tingling somewhere in the body
11. Feeling of heaviness in arms or legs
12. Achy muscles
13. Raised, red, itchy areas on the skin
14. Sudden swelling of the face or lips
15. Red/purple sores or blisters on your feet (including toes)
16. Leg swelling (Thrombosis)

17. Other symptom (please write in)  
18. None of these –FIXED CODE (EXCLUSIVE)  
19. Prefer not to say –FIXED CODE (EXCLUSIVE)

**Table S2a. Normative model estimates for primary summary scores**

**Parameter estimates** from normative modelling of primary measures for each task. Note, models are run separately for each task version.

|                              | Information Sampling Score | 2D Mental Manipulation V1 | 2D Mental Manipulation V2 | Immediate Memory | Delayed Memory | Spatial Working Memory<br>Maximum Span | Verbal Analogies V1 | Verbal Analogies V2 | Word Definitions | Spatial Planning V1 | Spatial Planning V2 |
|------------------------------|----------------------------|---------------------------|---------------------------|------------------|----------------|----------------------------------------|---------------------|---------------------|------------------|---------------------|---------------------|
| N                            | 115380                     | 42355                     | 94127                     | 141582           | 112964         | 129543                                 | 37382               | 82448               | 117587           | 37694               | 83253               |
| (Intercept)                  | -0.22                      | 0.53                      | 0.48                      | -0.04            | -0.04          | 0.66                                   | -0.07               | -0.56               | -1.61            | -0.16               | -0.27               |
| AGE_NOW_20                   | 0.01                       | -0.07                     | -0.12                     | 0.02             | 0.13           | -0.02                                  | -0.31               | -0.03               | 0.04             | -0.15               | -0.07               |
| AGE_NOW_25                   | 0.04                       | -0.18                     | -0.17                     | 0.06             | 0.11           | -0.06                                  | -0.36               | 0.04                | 0.15             | -0.15               | -0.04               |
| AGE_NOW_30                   | 0.00                       | -0.39                     | -0.28                     | 0.05             | 0.07           | -0.15                                  | -0.43               | 0.05                | 0.24             | -0.25               | -0.08               |
| AGE_NOW_35                   | -0.01                      | -0.41                     | -0.40                     | -0.05            | -0.06          | -0.26                                  | -0.46               | -0.05               | 0.30             | -0.27               | -0.10               |
| AGE_NOW_40                   | -0.05                      | -0.49                     | -0.49                     | -0.12            | -0.11          | -0.39                                  | -0.52               | -0.07               | 0.37             | -0.27               | -0.15               |
| AGE_NOW_45                   | -0.07                      | -0.67                     | -0.66                     | -0.17            | -0.16          | -0.47                                  | -0.49               | -0.07               | 0.48             | -0.36               | -0.20               |
| AGE_NOW_50                   | -0.06                      | -0.85                     | -0.85                     | -0.22            | -0.20          | -0.60                                  | -0.52               | -0.11               | 0.57             | -0.35               | -0.24               |
| AGE_NOW_55                   | -0.08                      | -1.04                     | -1.02                     | -0.28            | -0.27          | -0.78                                  | -0.62               | -0.16               | 0.67             | -0.42               | -0.30               |
| AGE_NOW_60                   | -0.08                      | -1.17                     | -1.18                     | -0.34            | -0.34          | -0.93                                  | -0.69               | -0.25               | 0.79             | -0.51               | -0.39               |
| AGE_NOW_65                   | -0.03                      | -1.35                     | -1.33                     | -0.40            | -0.40          | -1.04                                  | -0.76               | -0.28               | 0.91             | -0.59               | -0.47               |
| AGE_NOW_70                   | 0.00                       | -1.54                     | -1.51                     | -0.48            | -0.47          | -1.17                                  | -0.80               | -0.32               | 1.01             | -0.66               | -0.55               |
| AGE_NOW_75                   | 0.03                       | -1.70                     | -1.67                     | -0.59            | -0.57          | -1.32                                  | -0.92               | -0.40               | 1.05             | -0.74               | -0.67               |
| AGE_NOW_80                   | 0.05                       | -1.88                     | -1.85                     | -0.78            | -0.72          | -1.55                                  | -1.08               | -0.51               | 1.06             | -0.86               | -0.71               |
| AGE_NOW_85                   | 0.15                       | -1.96                     | -1.98                     | -0.82            | -0.78          | -1.65                                  | -1.14               | -0.59               | 1.07             | -0.78               | -0.86               |
| AGE_NOW_90                   | 0.19                       | -2.19                     | -2.03                     | -1.07            | -0.79          | -1.94                                  | -1.37               | -0.73               | 1.08             | -0.77               | -1.07               |
| AGE_NOW_95                   | 0.14                       | -1.95                     | -2.47                     | -1.15            | -1.21          | -1.74                                  | -1.11               | -0.62               | 0.98             | -1.20               | -0.98               |
| AGE_NOW_100                  | -0.59                      | 0.00                      | -2.14                     | 0.27             | -0.55          | -1.33                                  | 0.00                | -1.00               | 0.42             | 0.00                | -0.58               |
| U_GENDER_male                | 0.09                       | 0.00                      | 0.02                      | -0.08            | -0.06          | 0.25                                   | 0.02                | 0.04                | 0.08             | 0.27                | 0.27                |
| U_GENDER_unknown             | -0.28                      | 0.56                      | 0.17                      | -0.49            | -0.42          | 0.49                                   | 2.65                | 0.47                | -0.45            | -1.83               | -0.32               |
| ethnic_black                 | -0.07                      | -0.37                     | -0.33                     | -0.06            | -0.07          | -0.46                                  | -0.34               | -0.27               | -0.02            | -0.37               | -0.33               |
| ethnic_mixed                 | 0.10                       | 0.33                      | 0.38                      | 0.22             | 0.18           | -0.01                                  | 0.54                | 0.39                | 0.60             | 0.32                | 0.24                |
| ethnic_other                 | 0.04                       | 0.06                      | 0.06                      | -0.03            | -0.08          | -0.04                                  | -0.08               | -0.01               | 0.05             | 0.09                | -0.06               |
| ethnic_unknown               | 0.06                       | 0.33                      | 0.37                      | 0.07             | 0.08           | -0.16                                  | 0.36                | 0.24                | 0.51             | 0.16                | 0.16                |
| ethnic_white                 | 0.12                       | 0.49                      | 0.50                      | 0.23             | 0.23           | -0.05                                  | 0.45                | 0.36                | 0.57             | 0.34                | 0.30                |
| IMD_Q_2                      | 0.04                       | 0.06                      | 0.03                      | 0.06             | 0.05           | 0.04                                   | 0.08                | 0.14                | 0.11             | 0.10                | 0.08                |
| IMD_Q_3                      | 0.08                       | 0.08                      | 0.06                      | 0.11             | 0.09           | 0.06                                   | 0.12                | 0.20                | 0.15             | 0.14                | 0.14                |
| IMD_Q_4                      | 0.08                       | 0.06                      | 0.07                      | 0.12             | 0.10           | 0.09                                   | 0.12                | 0.21                | 0.16             | 0.14                | 0.16                |
| IMD_Q_5                      | 0.10                       | 0.08                      | 0.07                      | 0.14             | 0.11           | 0.11                                   | 0.17                | 0.27                | 0.18             | 0.15                | 0.18                |
| IMD_Q_unknown                | 0.07                       | -0.23                     | 0.09                      | 0.15             | 0.14           | 0.06                                   | 0.20                | 0.23                | 0.17             | 0.38                | 0.14                |
| educ_Degree                  | 0.08                       | 0.03                      | 0.02                      | 0.15             | 0.15           | 0.09                                   | 0.51                | 0.51                | 0.51             | 0.25                | 0.25                |
| educ_GCSE<5                  | -0.05                      | -0.05                     | -0.11                     | -0.18            | -0.18          | -0.17                                  | -0.53               | -0.51               | -0.46            | -0.32               | -0.34               |
| educ_GCSE>5                  | -0.01                      | -0.01                     | -0.02                     | -0.07            | -0.08          | -0.03                                  | -0.20               | -0.14               | -0.16            | -0.08               | -0.09               |
| educ_Higher                  | 0.01                       | -0.01                     | -0.02                     | 0.04             | 0.03           | -0.01                                  | 0.06                | 0.08                | 0.06             | 0.04                | 0.05                |
| educ_None                    | -0.04                      | -0.10                     | -0.08                     | -0.25            | -0.19          | -0.16                                  | -0.68               | -0.54               | -0.66            | -0.40               | -0.43               |
| educ_Other                   | 0.03                       | -0.11                     | -0.07                     | -0.04            | -0.01          | -0.05                                  | -0.21               | -0.15               | -0.15            | -0.11               | -0.08               |
| educ_unknown                 | 0.04                       | -0.13                     | -0.02                     | 0.03             | 0.05           | 0.02                                   | -0.44               | 0.19                | 0.17             | -0.23               | 0.08                |
| preexisting_Organ_transplant | -0.01                      | -0.01                     | 0.13                      | 0.00             | -0.06          | -0.16                                  | -0.10               | -0.09               | -0.12            | -0.14               | -0.06               |
| preexisting_Diabetes         | -0.04                      | -0.05                     | -0.06                     | -0.03            | -0.03          | -0.07                                  | -0.06               | -0.13               | -0.09            | -0.03               | -0.08               |
| preexisting_Heart_disease    | -0.01                      | -0.01                     | -0.03                     | -0.02            | -0.04          | 0.00                                   | -0.05               | -0.08               | -0.04            | -0.05               | -0.01               |
| preexisting_Hypertension     | -0.01                      | 0.00                      | 0.00                      | 0.00             | -0.01          | -0.03                                  | -0.02               | -0.04               | 0.00             | -0.06               | -0.04               |

|                                   |       |       |       |       |       |       |       |       |       |       |       |
|-----------------------------------|-------|-------|-------|-------|-------|-------|-------|-------|-------|-------|-------|
| preexisting_Stroke                | 0.02  | -0.15 | -0.16 | -0.10 | -0.13 | -0.12 | -0.12 | -0.06 | -0.08 | -0.12 | -0.07 |
| preexisting_Kidney_failure        | -0.01 | -0.09 | -0.06 | -0.02 | 0.03  | -0.01 | -0.02 | -0.12 | -0.01 | 0.05  | -0.04 |
| preexisting_Liver_disease         | -0.05 | 0.01  | 0.01  | -0.05 | -0.03 | -0.04 | -0.14 | -0.04 | -0.05 | -0.06 | -0.23 |
| preexisting_Anemia                | 0.00  | -0.06 | -0.05 | -0.03 | -0.01 | -0.04 | 0.03  | -0.07 | 0.01  | -0.02 | -0.06 |
| preexisting_Allergy               | 0.02  | 0.04  | 0.03  | 0.09  | 0.09  | 0.02  | 0.07  | 0.12  | 0.14  | 0.08  | 0.12  |
| preexisting_Asthma                | -0.03 | 0.01  | -0.01 | -0.03 | -0.03 | -0.02 | -0.07 | -0.09 | -0.04 | -0.07 | -0.06 |
| preexisting_Other_lung_disease    | -0.04 | -0.02 | -0.07 | -0.04 | -0.03 | -0.04 | -0.10 | -0.08 | -0.09 | -0.04 | -0.05 |
| preexisting_Cancer                | -0.01 | -0.02 | 0.04  | 0.01  | -0.01 | -0.01 | -0.01 | -0.01 | 0.00  | 0.02  | 0.01  |
| preexisting_Fibromyalgia          | -0.04 | -0.04 | -0.07 | -0.10 | -0.05 | -0.07 | -0.14 | -0.13 | -0.14 | -0.04 | -0.13 |
| preexisting_Epilepsy              | 0.04  | -0.21 | -0.27 | -0.25 | -0.29 | -0.21 | -0.11 | -0.16 | -0.11 | -0.35 | -0.19 |
| preexisting_Other_brainnerve      | 0.03  | -0.19 | -0.17 | -0.11 | -0.08 | -0.11 | -0.11 | 0.00  | 0.04  | -0.05 | -0.01 |
| preexisting_Osteoarthritis        | -0.02 | -0.01 | -0.01 | 0.02  | 0.03  | -0.01 | 0.01  | 0.02  | 0.06  | 0.02  | 0.01  |
| preexisting_Immunosuppression     | -0.02 | -0.02 | -0.05 | -0.01 | -0.01 | -0.04 | -0.02 | -0.08 | -0.04 | -0.01 | -0.06 |
| preexisting_Chronic_infection     | 0.05  | -0.14 | -0.02 | -0.13 | -0.08 | 0.01  | -0.02 | 0.00  | -0.21 | 0.09  | 0.07  |
| preexisting_Dementia              | -0.25 | -0.47 | -0.26 | -0.58 | -0.35 | -0.44 | -0.10 | -0.40 | -0.74 | 0.04  | -0.11 |
| preexisting_Anxiety               | -0.02 | -0.04 | -0.05 | -0.08 | -0.07 | -0.06 | -0.05 | -0.10 | -0.06 | -0.08 | -0.14 |
| preexisting_Depression            | -0.03 | 0.00  | -0.01 | -0.01 | 0.01  | -0.04 | -0.02 | 0.01  | -0.01 | -0.04 | -0.01 |
| preexisting_Other_psych_disease   | 0.07  | -0.20 | -0.08 | -0.11 | -0.11 | -0.11 | 0.01  | 0.02  | 0.14  | -0.05 | -0.05 |
| preexisting_Rheumatoid_arthritis  | -0.01 | 0.00  | -0.01 | -0.06 | -0.07 | -0.03 | -0.16 | -0.15 | -0.20 | -0.10 | -0.06 |
| preexisting_Hypothyroid           | 0.00  | -0.02 | -0.02 | 0.02  | 0.03  | 0.01  | 0.00  | -0.03 | 0.04  | 0.04  | -0.01 |
| preexisting_Adrenal_gland         | 0.15  | 0.14  | -0.06 | -0.41 | -0.17 | -0.13 | 0.18  | -0.02 | -0.07 | -0.17 | -0.07 |
| preexisting_Sleepapnoea_narco     | 0.00  | 0.01  | 0.06  | 0.01  | -0.04 | 0.00  | -0.06 | -0.08 | -0.09 | -0.01 | -0.06 |
| preexisting_Other_serious_illness | -0.02 | -0.06 | -0.07 | -0.02 | 0.02  | -0.03 | -0.02 | -0.04 | 0.00  | -0.02 | 0.00  |



**Table S2b. Normative model estimates for secondary summary scores**

Parameter estimates from normative modelling of secondary measures for each task. Models are run separately for each task version.

|                  | Information Sampling Response Time | Information Sampling N Samples | Information Sampling Percent Correct | Information Sampling Total Points | 2D Mental Manipulation V1 RT | 2D Mental Manipulation V2 RT | Spatial Working Memory RT | Verbal Analogies V1 RT | Verbal Analogies V2 RT | Word Definitions RT | Spatial Planning V1 RT | Spatial Planning V2 RT |
|------------------|------------------------------------|--------------------------------|--------------------------------------|-----------------------------------|------------------------------|------------------------------|---------------------------|------------------------|------------------------|---------------------|------------------------|------------------------|
| N                | 115380                             | 115380                         | 115380                               | 115380                            | 42344                        | 94074                        | 129368                    | 37382                  | 82428                  | 117572              | 37694                  | 83253                  |
| (Intercept)      | -0.61                              | -0.15                          | -0.40                                | -0.22                             | -0.53                        | -0.54                        | -0.61                     | -1.08                  | -0.88                  | -0.11               | -0.67                  | -0.78                  |
| AGE_NOW_20       | 0.02                               | 0.02                           | 0.01                                 | 0.01                              | -0.09                        | 0.10                         | 0.02                      | 0.13                   | -0.03                  | 0.10                | -0.14                  | 0.05                   |
| AGE_NOW_25       | 0.05                               | 0.03                           | 0.03                                 | 0.04                              | 0.06                         | 0.15                         | 0.07                      | 0.17                   | 0.09                   | 0.35                | -0.13                  | 0.05                   |
| AGE_NOW_30       | 0.16                               | 0.12                           | 0.00                                 | 0.00                              | 0.21                         | 0.27                         | 0.18                      | 0.39                   | 0.24                   | 0.48                | -0.08                  | 0.14                   |
| AGE_NOW_35       | 0.22                               | 0.17                           | 0.01                                 | -0.01                             | 0.25                         | 0.36                         | 0.22                      | 0.55                   | 0.40                   | 0.57                | -0.06                  | 0.18                   |
| AGE_NOW_40       | 0.27                               | 0.23                           | 0.00                                 | -0.05                             | 0.32                         | 0.44                         | 0.32                      | 0.63                   | 0.50                   | 0.58                | 0.00                   | 0.20                   |
| AGE_NOW_45       | 0.33                               | 0.25                           | 0.02                                 | -0.07                             | 0.45                         | 0.61                         | 0.43                      | 0.76                   | 0.59                   | 0.57                | 0.08                   | 0.27                   |
| AGE_NOW_50       | 0.38                               | 0.23                           | 0.07                                 | -0.06                             | 0.62                         | 0.76                         | 0.58                      | 0.92                   | 0.77                   | 0.62                | 0.23                   | 0.38                   |
| AGE_NOW_55       | 0.50                               | 0.25                           | 0.12                                 | -0.08                             | 0.80                         | 0.91                         | 0.68                      | 1.08                   | 0.92                   | 0.65                | 0.38                   | 0.49                   |
| AGE_NOW_60       | 0.56                               | 0.20                           | 0.13                                 | -0.08                             | 0.92                         | 1.06                         | 0.74                      | 1.24                   | 1.04                   | 0.63                | 0.47                   | 0.57                   |
| AGE_NOW_65       | 0.60                               | 0.13                           | 0.15                                 | -0.03                             | 1.07                         | 1.19                         | 0.78                      | 1.39                   | 1.20                   | 0.62                | 0.62                   | 0.68                   |
| AGE_NOW_70       | 0.58                               | 0.03                           | 0.15                                 | 0.00                              | 1.24                         | 1.33                         | 0.84                      | 1.61                   | 1.36                   | 0.66                | 0.78                   | 0.77                   |
| AGE_NOW_75       | 0.56                               | -0.07                          | 0.18                                 | 0.03                              | 1.37                         | 1.46                         | 0.90                      | 1.78                   | 1.53                   | 0.73                | 0.89                   | 0.83                   |
| AGE_NOW_80       | 0.55                               | -0.13                          | 0.17                                 | 0.05                              | 1.53                         | 1.57                         | 0.99                      | 1.95                   | 1.69                   | 0.82                | 1.00                   | 1.01                   |
| AGE_NOW_85       | 0.44                               | -0.26                          | 0.21                                 | 0.15                              | 1.60                         | 1.72                         | 1.00                      | 2.09                   | 1.86                   | 0.85                | 1.34                   | 1.01                   |
| AGE_NOW_90       | 0.19                               | -0.48                          | 0.20                                 | 0.19                              | 1.85                         | 1.78                         | 0.97                      | 2.58                   | 2.05                   | 0.98                | 1.58                   | 1.20                   |
| AGE_NOW_95       | 0.33                               | -0.37                          | 0.15                                 | 0.14                              | 1.21                         | 2.16                         | 1.18                      | 2.09                   | 2.42                   | 1.06                | 0.61                   | 1.21                   |
| AGE_NOW_100      | -0.83                              | -1.33                          | -1.48                                | -0.59                             | 0.00                         | 2.07                         | 0.50                      | 0.00                   | 0.14                   | 0.88                | 0.00                   | 0.90                   |
| U_GENDER_male    | 0.08                               | 0.02                           | 0.10                                 | 0.09                              | 0.07                         | 0.05                         | 0.24                      | 0.19                   | 0.18                   | 0.19                | 0.14                   | 0.12                   |
| U_GENDER_unknown | 0.13                               | 0.02                           | 0.20                                 | -0.28                             | -0.82                        | -0.13                        | -0.06                     | -1.47                  | 0.32                   | -2.00               | -2.02                  | -0.66                  |
| ethnic_black     | 0.19                               | 0.07                           | -0.11                                | -0.07                             | 0.22                         | 0.13                         | 0.07                      | 0.14                   | 0.05                   | 0.14                | 0.05                   | -0.02                  |
| ethnic_mixed     | 0.10                               | 0.02                           | 0.07                                 | 0.10                              | -0.21                        | -0.29                        | -0.12                     | -0.15                  | -0.09                  | -0.37               | 0.10                   | 0.14                   |
| ethnic_other     | -0.01                              | -0.02                          | 0.01                                 | 0.04                              | -0.07                        | -0.12                        | -0.06                     | 0.11                   | 0.06                   | 0.03                | -0.01                  | -0.03                  |
| ethnic_unknown   | -0.04                              | -0.02                          | 0.00                                 | 0.06                              | -0.37                        | -0.40                        | -0.21                     | -0.22                  | -0.30                  | -0.43               | -0.07                  | -0.04                  |
| ethnic_white     | 0.04                               | 0.01                           | 0.08                                 | 0.12                              | -0.37                        | -0.44                        | -0.16                     | -0.23                  | -0.24                  | -0.42               | 0.05                   | 0.06                   |
| IMD_Q_2          | 0.02                               | 0.01                           | 0.06                                 | 0.04                              | 0.00                         | 0.01                         | 0.01                      | 0.06                   | 0.05                   | -0.03               | 0.05                   | 0.08                   |
| IMD_Q_3          | 0.03                               | 0.01                           | 0.08                                 | 0.08                              | -0.01                        | 0.00                         | 0.00                      | 0.07                   | 0.07                   | -0.05               | 0.11                   | 0.12                   |
| IMD_Q_4          | 0.04                               | 0.01                           | 0.08                                 | 0.08                              | 0.02                         | 0.01                         | 0.01                      | 0.07                   | 0.07                   | -0.05               | 0.11                   | 0.14                   |
| IMD_Q_5          | 0.05                               | 0.01                           | 0.11                                 | 0.10                              | 0.02                         | 0.02                         | 0.01                      | 0.06                   | 0.09                   | -0.07               | 0.10                   | 0.16                   |
| IMD_Q_unknown    | 0.05                               | 0.01                           | 0.07                                 | 0.07                              | 0.41                         | -0.03                        | 0.01                      | 0.21                   | 0.07                   | -0.06               | 0.29                   | 0.12                   |
| educ_Degree      | 0.17                               | 0.04                           | 0.12                                 | 0.08                              | 0.07                         | 0.06                         | 0.13                      | 0.03                   | 0.09                   | -0.32               | 0.20                   | 0.20                   |
| educ_GCSE<5      | -0.12                              | -0.07                          | -0.07                                | -0.05                             | -0.09                        | -0.03                        | -0.10                     | 0.01                   | -0.01                  | 0.27                | -0.16                  | -0.24                  |
| educ_GCSE>5      | -0.05                              | -0.02                          | -0.03                                | -0.01                             | -0.03                        | -0.03                        | -0.04                     | 0.01                   | -0.01                  | 0.09                | -0.05                  | -0.07                  |
| educ_Higher      | 0.00                               | -0.03                          | 0.02                                 | 0.01                              | 0.03                         | 0.03                         | 0.02                      | 0.08                   | 0.10                   | 0.01                | 0.05                   | 0.06                   |
| educ_None        | -0.16                              | -0.12                          | -0.09                                | -0.04                             | -0.12                        | -0.14                        | -0.13                     | -0.03                  | -0.04                  | 0.42                | -0.35                  | -0.41                  |
| educ_Other       | -0.07                              | -0.07                          | 0.02                                 | 0.03                              | 0.08                         | 0.03                         | 0.01                      | 0.16                   | 0.12                   | 0.21                | -0.03                  | -0.03                  |
| educ_unknown     | 0.05                               | -0.01                          | 0.05                                 | 0.04                              | 0.01                         | 0.04                         | 0.03                      | 0.11                   | 0.07                   | -0.10               | -0.14                  | 0.07                   |

|                                   |       |       |       |       |       |       |       |       |       |       |       |       |
|-----------------------------------|-------|-------|-------|-------|-------|-------|-------|-------|-------|-------|-------|-------|
| preexisting_Organ_transplant      | -0.09 | -0.10 | -0.02 | -0.01 | 0.06  | -0.26 | -0.13 | -0.03 | 0.03  | -0.06 | -0.06 | -0.15 |
| preexisting_Diabetes              | -0.02 | -0.04 | -0.04 | -0.04 | 0.01  | 0.01  | 0.03  | -0.05 | -0.06 | 0.07  | -0.09 | -0.10 |
| preexisting_Heart_disease         | -0.01 | -0.02 | -0.02 | -0.01 | -0.01 | 0.00  | 0.03  | 0.00  | 0.02  | 0.02  | -0.05 | 0.00  |
| preexisting_Hypertension          | -0.02 | -0.01 | -0.01 | -0.01 | 0.00  | -0.01 | 0.00  | 0.00  | -0.03 | 0.00  | -0.03 | -0.03 |
| preexisting_Stroke                | -0.01 | -0.06 | -0.06 | 0.02  | 0.12  | 0.15  | 0.06  | 0.17  | 0.07  | 0.15  | 0.02  | -0.01 |
| preexisting_Kidney_failure        | 0.00  | -0.04 | 0.07  | -0.01 | 0.13  | 0.04  | -0.04 | 0.02  | -0.01 | 0.10  | -0.02 | -0.05 |
| preexisting_Liver_disease         | 0.00  | 0.00  | -0.09 | -0.05 | 0.01  | -0.04 | -0.14 | -0.01 | -0.03 | 0.01  | 0.00  | -0.23 |
| preexisting_Anemia                | -0.05 | -0.04 | -0.02 | 0.00  | 0.03  | 0.00  | -0.01 | 0.04  | 0.00  | 0.01  | 0.04  | -0.02 |
| preexisting_Allergy               | 0.05  | -0.01 | 0.04  | 0.02  | 0.00  | 0.00  | 0.06  | 0.01  | 0.03  | -0.08 | 0.08  | 0.09  |
| preexisting_Asthma                | 0.00  | 0.02  | -0.04 | -0.03 | -0.01 | 0.00  | -0.06 | -0.06 | -0.05 | 0.02  | -0.09 | -0.07 |
| preexisting_Other_lung_disease    | 0.00  | -0.01 | 0.00  | -0.04 | -0.08 | 0.04  | 0.01  | -0.06 | -0.01 | 0.07  | -0.10 | -0.05 |
| preexisting_Cancer                | 0.00  | -0.01 | -0.01 | -0.01 | 0.00  | -0.04 | 0.01  | 0.00  | -0.05 | -0.02 | -0.06 | 0.02  |
| preexisting_Fibromyalgia          | -0.01 | 0.01  | -0.09 | -0.04 | -0.01 | 0.00  | -0.01 | 0.06  | -0.02 | 0.03  | -0.03 | -0.08 |
| preexisting_Epilepsy              | -0.01 | -0.16 | -0.11 | 0.04  | 0.06  | 0.17  | 0.16  | -0.10 | 0.17  | 0.01  | 0.07  | 0.03  |
| preexisting_Other_brainnerve      | 0.04  | -0.07 | 0.02  | 0.03  | 0.16  | 0.19  | 0.20  | 0.23  | 0.19  | 0.08  | 0.12  | 0.13  |
| preexisting_Osteoarthritis        | -0.01 | -0.02 | -0.01 | -0.02 | 0.02  | 0.01  | -0.04 | 0.00  | -0.02 | -0.02 | 0.05  | 0.01  |
| preexisting_Immunosuppression     | -0.03 | -0.02 | -0.01 | -0.02 | 0.00  | 0.03  | 0.02  | 0.00  | 0.01  | 0.05  | 0.02  | -0.03 |
| preexisting_Chronic_infection     | -0.12 | 0.03  | 0.09  | 0.05  | 0.09  | -0.07 | -0.02 | 0.30  | -0.09 | 0.09  | 0.01  | -0.18 |
| preexisting_Dementia              | 0.01  | 0.14  | -0.26 | -0.25 | 0.66  | -0.01 | -0.29 | 0.31  | -0.22 | 0.13  | -0.14 | -0.30 |
| preexisting_Anxiety               | -0.04 | 0.00  | -0.01 | -0.02 | 0.01  | 0.01  | -0.02 | 0.01  | -0.02 | 0.02  | -0.04 | -0.07 |
| preexisting_Depression            | 0.02  | -0.01 | -0.04 | -0.03 | -0.01 | -0.01 | 0.05  | 0.00  | -0.03 | -0.04 | -0.03 | -0.07 |
| preexisting_Other_psych_disease   | -0.07 | -0.12 | -0.03 | 0.07  | 0.14  | 0.05  | -0.01 | 0.07  | 0.03  | -0.09 | 0.09  | 0.05  |
| preexisting_Rheumatoid_arthritis  | -0.04 | -0.05 | -0.06 | -0.01 | -0.03 | 0.01  | 0.00  | -0.03 | -0.02 | 0.12  | -0.09 | -0.08 |
| preexisting_Hypothyroid           | -0.02 | -0.01 | -0.01 | 0.00  | 0.04  | 0.01  | -0.03 | 0.00  | -0.01 | -0.01 | 0.04  | -0.02 |
| preexisting_Adrenal_gland         | -0.11 | -0.18 | 0.00  | 0.15  | -0.23 | -0.01 | -0.10 | -0.06 | -0.13 | -0.04 | -0.09 | 0.06  |
| preexisting_Sleepapnoea_narco     | -0.07 | -0.04 | -0.06 | 0.00  | 0.00  | -0.08 | -0.02 | -0.01 | 0.01  | 0.04  | -0.10 | -0.03 |
| preexisting_Other_serious_illness | 0.02  | -0.02 | 0.01  | -0.02 | 0.06  | 0.06  | 0.05  | 0.09  | 0.08  | 0.03  | 0.05  | 0.06  |

**Table S2c. Normative model estimates for memory error types**

**Parameter estimates** from normative modelling of memory error scores. Note, models are run separately for tasks with different versions of stimuli.

|                  | Delayed Memory RT | Delayed Memory Precision Errors | Delayed Memory Binding Errors | Delayed Memory Correct | Immediate Memory RT | Immediate Memory Precision Errors | Immediate Memory Binding Errors | Immediate Memory Correct |
|------------------|-------------------|---------------------------------|-------------------------------|------------------------|---------------------|-----------------------------------|---------------------------------|--------------------------|
| N                | 141582            | 141582                          | 141582                        | 141582                 | 108171              | 112964                            | 112964                          | 112964                   |
| (Intercept)      | -0.37             | -0.03                           | -0.10                         | 0.00                   | -0.57               | -0.07                             | -0.19                           | -0.01                    |
| AGE_NOW_20       | 0.04              | 0.01                            | 0.02                          | 0.00                   | -0.05               | -0.04                             | -0.03                           | 0.12                     |
| AGE_NOW_25       | 0.05              | -0.01                           | 0.03                          | 0.02                   | 0.01                | -0.01                             | 0.00                            | 0.10                     |
| AGE_NOW_30       | 0.11              | -0.01                           | 0.04                          | 0.01                   | 0.11                | 0.01                              | 0.01                            | 0.06                     |
| AGE_NOW_35       | 0.17              | 0.06                            | 0.11                          | -0.09                  | 0.19                | 0.08                              | 0.08                            | -0.06                    |
| AGE_NOW_40       | 0.19              | 0.13                            | 0.15                          | -0.15                  | 0.25                | 0.13                              | 0.11                            | -0.12                    |
| AGE_NOW_45       | 0.29              | 0.17                            | 0.20                          | -0.21                  | 0.41                | 0.19                              | 0.15                            | -0.17                    |
| AGE_NOW_50       | 0.38              | 0.22                            | 0.24                          | -0.26                  | 0.57                | 0.22                              | 0.19                            | -0.21                    |
| AGE_NOW_55       | 0.48              | 0.26                            | 0.30                          | -0.33                  | 0.76                | 0.27                              | 0.23                            | -0.28                    |
| AGE_NOW_60       | 0.56              | 0.31                            | 0.34                          | -0.39                  | 0.90                | 0.31                              | 0.26                            | -0.35                    |
| AGE_NOW_65       | 0.64              | 0.38                            | 0.36                          | -0.45                  | 1.05                | 0.36                              | 0.27                            | -0.41                    |
| AGE_NOW_70       | 0.74              | 0.43                            | 0.41                          | -0.52                  | 1.21                | 0.41                              | 0.29                            | -0.48                    |
| AGE_NOW_75       | 0.91              | 0.49                            | 0.46                          | -0.63                  | 1.38                | 0.47                              | 0.33                            | -0.58                    |
| AGE_NOW_80       | 1.05              | 0.62                            | 0.52                          | -0.81                  | 1.57                | 0.54                              | 0.33                            | -0.71                    |
| AGE_NOW_85       | 1.24              | 0.66                            | 0.48                          | -0.83                  | 1.73                | 0.69                              | 0.30                            | -0.75                    |
| AGE_NOW_90       | 1.62              | 0.81                            | 0.50                          | -1.04                  | 2.05                | 0.66                              | 0.29                            | -0.76                    |
| AGE_NOW_95       | 1.25              | 0.95                            | 0.25                          | -1.02                  | 1.77                | 0.56                              | -0.07                           | -1.13                    |
| AGE_NOW_100      | 0.92              | -0.36                           | -0.39                         | 0.46                   | 0.16                | 0.47                              | -0.04                           | -0.21                    |
| U_GENDER_male    | 0.19              | 0.05                            | -0.06                         | -0.03                  | 0.11                | 0.08                              | -0.06                           | -0.02                    |
| U_GENDER_unknown | -0.68             | -0.08                           | 0.32                          | -0.59                  | -0.75               | -0.16                             | -0.63                           | -0.46                    |
| ethnic_black     | 0.25              | 0.01                            | -0.01                         | -0.07                  | 0.35                | -0.01                             | 0.02                            | -0.08                    |
| ethnic_mixed     | -0.15             | -0.16                           | -0.07                         | 0.20                   | -0.19               | -0.07                             | 0.02                            | 0.16                     |
| ethnic_other     | -0.12             | 0.02                            | 0.02                          | -0.04                  | -0.14               | 0.04                              | -0.01                           | -0.07                    |
| ethnic_unknown   | -0.29             | -0.02                           | -0.01                         | 0.06                   | -0.32               | -0.02                             | -0.01                           | 0.07                     |
| ethnic_white     | -0.26             | -0.13                           | -0.09                         | 0.21                   | -0.29               | -0.11                             | 0.01                            | 0.20                     |
| IMD_Q_2          | 0.02              | -0.04                           | -0.03                         | 0.07                   | 0.01                | -0.04                             | 0.01                            | 0.04                     |
| IMD_Q_3          | 0.02              | -0.08                           | -0.04                         | 0.11                   | 0.01                | -0.08                             | 0.00                            | 0.08                     |
| IMD_Q_4          | 0.04              | -0.09                           | -0.05                         | 0.12                   | 0.01                | -0.09                             | -0.01                           | 0.09                     |
| IMD_Q_5          | 0.06              | -0.11                           | -0.06                         | 0.13                   | 0.01                | -0.09                             | -0.01                           | 0.10                     |
| IMD_Q_unknown    | 0.02              | -0.10                           | -0.07                         | 0.15                   | -0.01               | -0.09                             | 0.01                            | 0.13                     |
| educ_Degree      | 0.07              | -0.13                           | -0.07                         | 0.14                   | 0.03                | -0.10                             | -0.01                           | 0.14                     |
| educ_GCSE<5      | -0.06             | 0.12                            | 0.09                          | -0.18                  | -0.01               | 0.13                              | 0.07                            | -0.19                    |
| educ_GCSE>5      | -0.01             | 0.06                            | 0.01                          | -0.07                  | -0.01               | 0.06                              | -0.01                           | -0.07                    |
| educ_Higher      | 0.01              | -0.04                           | -0.01                         | 0.03                   | 0.01                | -0.04                             | 0.00                            | 0.02                     |
| educ_None        | -0.09             | 0.18                            | 0.11                          | -0.25                  | -0.05               | 0.11                              | 0.10                            | -0.20                    |

|                                   |       |       |       |       |       |       |       |       |
|-----------------------------------|-------|-------|-------|-------|-------|-------|-------|-------|
| educ_Other                        | 0.01  | 0.03  | -0.01 | -0.03 | 0.03  | -0.01 | 0.00  | -0.01 |
| educ_unknown                      | 0.03  | -0.03 | -0.02 | 0.03  | 0.06  | -0.04 | 0.01  | 0.04  |
| preexisting_Organ_transplant      | 0.02  | -0.04 | -0.02 | 0.01  | 0.11  | -0.03 | 0.12  | -0.08 |
| preexisting_Diabetes              | -0.06 | 0.02  | 0.00  | -0.03 | 0.02  | 0.00  | -0.03 | -0.02 |
| preexisting_Heart_disease         | 0.01  | 0.02  | 0.02  | -0.02 | 0.01  | 0.02  | 0.00  | -0.03 |
| preexisting_Hypertension          | -0.02 | -0.01 | 0.00  | 0.00  | -0.02 | 0.02  | 0.01  | -0.01 |
| preexisting_Stroke                | 0.07  | 0.07  | 0.04  | -0.10 | 0.09  | 0.12  | 0.04  | -0.13 |
| preexisting_Kidney_failure        | 0.09  | 0.01  | 0.01  | -0.01 | 0.03  | -0.01 | -0.06 | 0.05  |
| preexisting_Liver_disease         | -0.02 | 0.10  | -0.03 | -0.04 | 0.00  | 0.02  | -0.01 | -0.04 |
| preexisting_Anaemia               | -0.05 | 0.05  | 0.01  | -0.04 | -0.01 | -0.01 | 0.02  | -0.02 |
| preexisting_Allergy               | 0.03  | -0.07 | -0.04 | 0.08  | 0.04  | -0.06 | -0.03 | 0.09  |
| preexisting_Asthma                | -0.04 | 0.03  | 0.00  | -0.03 | -0.05 | 0.02  | -0.01 | -0.03 |
| preexisting_Other_lung_disease    | 0.04  | 0.05  | 0.00  | -0.04 | 0.04  | 0.03  | 0.01  | -0.04 |
| preexisting_Cancer                | -0.03 | 0.00  | 0.00  | 0.01  | 0.02  | -0.01 | -0.01 | -0.01 |
| preexisting_Fibromyalgia          | -0.04 | 0.12  | -0.01 | -0.08 | 0.01  | 0.11  | -0.04 | -0.03 |
| preexisting_Epilepsy              | 0.17  | 0.19  | 0.09  | -0.24 | 0.20  | 0.07  | -0.08 | -0.25 |
| preexisting_Other_brainnerve      | 0.25  | 0.07  | 0.03  | -0.10 | 0.21  | 0.08  | 0.07  | -0.08 |
| preexisting_Osteoarthritis        | -0.03 | -0.01 | -0.01 | 0.02  | -0.01 | -0.02 | -0.01 | 0.03  |
| preexisting_Immunosuppression     | 0.00  | 0.02  | -0.01 | 0.00  | 0.02  | 0.00  | -0.01 | -0.01 |
| preexisting_Chronic_infection     | 0.00  | 0.05  | 0.13  | -0.15 | -0.06 | 0.07  | 0.10  | -0.07 |
| preexisting_Dementia              | 0.09  | 0.54  | -0.03 | -0.51 | -0.15 | 0.28  | 0.10  | -0.34 |
| preexisting_Anxiety               | 0.02  | 0.05  | 0.04  | -0.07 | 0.02  | 0.05  | 0.00  | -0.07 |
| preexisting_Depression            | -0.02 | 0.01  | -0.03 | 0.00  | 0.00  | 0.02  | 0.02  | 0.01  |
| preexisting_Other_psych_disease   | 0.09  | 0.07  | 0.04  | -0.11 | 0.09  | 0.03  | 0.06  | -0.14 |
| preexisting_Rheumatoid_arthritis  | -0.04 | 0.04  | 0.02  | -0.06 | -0.05 | 0.04  | -0.04 | -0.06 |
| preexisting_Hypothyroid           | 0.01  | -0.04 | 0.01  | 0.02  | 0.02  | -0.02 | 0.00  | 0.03  |
| preexisting_Adrenal_gland         | -0.18 | 0.33  | 0.17  | -0.39 | -0.11 | 0.16  | 0.32  | -0.21 |
| preexisting_Sleepapnoea_narco     | -0.05 | -0.04 | 0.03  | 0.00  | -0.03 | 0.00  | -0.01 | -0.04 |
| preexisting_Other_serious_illness | 0.08  | 0.00  | 0.02  | -0.02 | 0.05  | 0.00  | -0.01 | 0.03  |

**Table S3. Factors used in propensity score matching analyses**

| <b>Contrasted factors</b>                                                                                                                                                                                                                                                                     | <b>Propensity matched factors</b>                                                                                                                                                                                                  |
|-----------------------------------------------------------------------------------------------------------------------------------------------------------------------------------------------------------------------------------------------------------------------------------------------|------------------------------------------------------------------------------------------------------------------------------------------------------------------------------------------------------------------------------------|
| 1. Participants from the no-Covid-19 group were matched to each cell within the illness duration * variant period factorial independently.                                                                                                                                                    | Age group, sex, ethnicity and race, education level, index of multiple-deprivation, number of preexisting conditions, presence of subjective cognitive symptoms (poor memory or “brain fog”).                                      |
| 2. People who had one or more than one vaccination vs. people who had not been vaccinated prior to their Covid-19 illness.                                                                                                                                                                    | Age group, sex, ethnicity and race, education level, index of multiple-deprivation, number of preexisting conditions, variant period                                                                                               |
| 3. People who had two initial AstraZeneca vaccinations vs. people who had two initial Pfizer vaccinations.                                                                                                                                                                                    | Age group, sex, ethnicity and race, education level, index of multiple-deprivation, number of preexisting conditions, variant period                                                                                               |
| 4. People who visited the emergency department, were admitted to hospital or intensive care, or sought non-hospital medical assistance vs. i) people who were infected but did not visit the hospital or seek non-hospital medical assistance, and ii) vs. people from the No-Covid-19 group. | Age group, sex, ethnicity and race, education level, index of multiple-deprivation, number of preexisting conditions, variant period, vaccination status and illness-duration.                                                     |
| 5. People who had one vs. people who had more than one Covid-19 episode.                                                                                                                                                                                                                      | Age group, sex, ethnicity and race, education level, index of multiple-deprivation, number of preexisting conditions                                                                                                               |
| 6. People who had one vs. people who had more than one Covid-19 episode, controlling for additional covariates.                                                                                                                                                                               | Age group, sex, ethnicity and race, education level, index of multiple-deprivation, number of preexisting conditions, variant period, vaccination status, illness duration, emergency department visit, hospital admission or ICU. |

Participants were propensity score matched between groups as defined in the left column using logistic regression to generate propensity scores from factors as defined in the right column. Selection of matched samples was then done within contiguous set ranges across the propensity scale. The width of the ranges was optimised to minimise the effect size difference between the mean propensity scores of the contrasted groups while maximising the number of observations in the contrasted groups.

**Table S4a. Demographics and group distributions relative to the sampling frame**

|                                        | 800,000 contacted |         | Started Cognitron |        | Completed Cognitron |        |
|----------------------------------------|-------------------|---------|-------------------|--------|---------------------|--------|
|                                        | Count             | Percent | True              | False  | True                | False  |
| <b>Covid group</b>                     |                   |         |                   |        |                     |        |
| REACT1&2                               |                   |         |                   |        |                     |        |
| positive                               | 99239             | 12.40%  | 10.09%            | 12.93% | 9.98%               | 12.80% |
| >=12weeks                              | 52501             | 6.60%   | 7.55%             | 6.34%  | 7.71%               | 6.37%  |
| REACT No-Covid-19                      | 648260            | 81.00%  | 82.35%            | 80.73% | 82.31%              | 80.82% |
| <b>Age</b>                             |                   |         |                   |        |                     |        |
| 18to19                                 | 11876             | 1.50%   | 0.80%             | 1.64%  | 0.67%               | 1.62%  |
| 20to24                                 | 27929             | 3.50%   | 1.80%             | 3.88%  | 1.58%               | 3.80%  |
| 25to29                                 | 37031             | 4.60%   | 2.70%             | 5.07%  | 2.46%               | 4.99%  |
| 30to34                                 | 48349             | 6.00%   | 3.90%             | 6.53%  | 3.60%               | 6.45%  |
| 35to39                                 | 56301             | 7.00%   | 5.04%             | 7.49%  | 4.84%               | 7.40%  |
| 40to44                                 | 64373             | 8.10%   | 6.65%             | 8.36%  | 6.63%               | 8.28%  |
| 45to49                                 | 67502             | 8.40%   | 7.63%             | 8.62%  | 7.80%               | 8.54%  |
| 50to54                                 | 82844             | 10.40%  | 10.36%            | 10.35% | 10.66%              | 10.31% |
| 55to59                                 | 90918             | 11.40%  | 12.95%            | 11.00% | 13.33%              | 11.04% |
| 60to64                                 | 88128             | 11.00%  | 14.20%            | 10.29% | 14.69%              | 10.41% |
| 65to69                                 | 79741             | 10.00%  | 13.75%            | 9.11%  | 14.15%              | 9.28%  |
| 70to74                                 | 70265             | 8.80%   | 10.96%            | 8.29%  | 10.88%              | 8.44%  |
| 75to79                                 | 48000             | 6.00%   | 6.63%             | 5.86%  | 6.35%               | 5.94%  |
| 80+                                    | 26743             | 3.30%   | 2.64%             | 3.50%  | 2.37%               | 3.50%  |
| <b>Sex</b>                             |                   |         |                   |        |                     |        |
| male                                   | 345792            | 43.20%  | 40.30%            | 43.89% | 39.60%              | 43.82% |
| female                                 | 454197            | 56.80%  | 59.70%            | 56.11% | 60.40%              | 56.18% |
| <b>Ethnicity and race</b>              |                   |         |                   |        |                     |        |
| white                                  | 739355            | 93.45%  | 95.28%            | 93.04% | 95.59%              | 93.10% |
| asian                                  | 27474             | 3.47%   | 2.31%             | 3.74%  | 2.10%               | 3.70%  |
| black                                  | 7455              | 0.94%   | 0.64%             | 1.01%  | 0.57%               | 1.00%  |
| other                                  | 6356              | 0.80%   | 0.63%             | 0.84%  | 0.60%               | 0.84%  |
| mixed                                  | 10495             | 1.33%   | 1.14%             | 1.37%  | 1.14%               | 1.36%  |
| <b>Index of Multiple Deprivation_Q</b> |                   |         |                   |        |                     |        |
| 1 (most deprived)                      | 78052             | 9.80%   | 7.89%             | 10.21% | 7.66%               | 10.12% |
| 2                                      | 126326            | 15.80%  | 14.70%            | 16.08% | 14.50%              | 16.04% |
| 3                                      | 171326            | 21.50%  | 21.43%            | 21.47% | 21.35%              | 21.48% |
| 4                                      | 198825            | 24.90%  | 25.55%            | 24.76% | 25.65%              | 24.78% |
| 5 (most affluent)                      | 223780            | 28.00%  | 30.44%            | 27.48% | 30.83%              | 27.57% |
| <b>Region</b>                          |                   |         |                   |        |                     |        |
| London                                 | 87727             | 11.00%  | 10.92%            | 10.98% | 10.84%              | 10.99% |
| East Midlands                          | 91964             | 11.50%  | 11.05%            | 11.60% | 11.04%              | 11.57% |
| South East                             | 170674            | 21.30%  | 22.16%            | 21.15% | 22.31%              | 21.17% |
| Yorkshire & The                        | 59218             | 7.40%   | 7.50%             | 7.38%  | 7.47%               | 7.39%  |
| West Midlands                          | 75373             | 9.40%   | 8.94%             | 9.53%  | 8.93%               | 9.50%  |
| North East                             | 31383             | 3.90%   | 3.72%             | 3.97%  | 3.67%               | 3.96%  |
| North West                             | 93355             | 11.70%  | 10.81%            | 11.87% | 10.63%              | 11.84% |
| East of England                        | 109720            | 13.70%  | 13.93%            | 13.67% | 14.00%              | 13.67% |
| South West                             | 80586             | 10.10%  | 10.98%            | 9.87%  | 11.10%              | 9.91%  |

**Table S4b. Selection bias for people with subjective cognitive symptoms**

|                                  | No subjective cognitive symptoms | Poor memory or “brain fog” within the past two weeks |
|----------------------------------|----------------------------------|------------------------------------------------------|
| <b>No-Covid-19</b>               | 0.55                             | 0.59                                                 |
| <b>Asymptomatic</b>              | 0.56                             | 0.59                                                 |
| <b>&lt;4 weeks</b>               | 0.54                             | 0.57                                                 |
| <b>4-12 weeks</b>                | 0.55                             | 0.59                                                 |
| <b>&gt;= 12 weeks resolved</b>   | 0.55                             | 0.56                                                 |
| <b>&gt;= 12 weeks unresolved</b> | 0.52                             | 0.58                                                 |
| <b>Unknown duration</b>          | 0.32                             | 0.41                                                 |

Proportion of people undertaking the cognitive assessment on completion of the survey from different illness-duration categories according to whether they reported experiencing poor memory or “brain fog” within the past two weeks.

**Table S4c. Demographics and group distributions for participants who started and completed the cognitive study**

|                  | Group            | Started       |         | Completed     |         |
|------------------|------------------|---------------|---------|---------------|---------|
|                  |                  | Count         | Percent | Count         | Percent |
| <b>Age</b>       | 18-              | 1106          | 0.78%   | 754           | 0.67%   |
|                  | 20-              | 2501          | 1.77%   | 1787          | 1.58%   |
|                  | 25-              | 3818          | 2.70%   | 2776          | 2.46%   |
|                  | 30-              | 5514          | 3.89%   | 4068          | 3.60%   |
|                  | 35-              | 7156          | 5.05%   | 5465          | 4.84%   |
|                  | 40-              | 9539          | 6.74%   | 7491          | 6.63%   |
|                  | 45-              | 10951         | 7.73%   | 8809          | 7.80%   |
|                  | 50-              | 14813         | 10.46%  | 12043         | 10.66%  |
|                  | 55-              | 18438         | 13.02%  | 15056         | 13.33%  |
|                  | 60-              | 20176         | 14.25%  | 16592         | 14.69%  |
|                  | 65-              | 19429         | 13.72%  | 15980         | 14.15%  |
|                  | 70-              | 15344         | 10.84%  | 12294         | 10.88%  |
|                  | 75-              | 9196          | 6.50%   | 7175          | 6.35%   |
|                  | 80-              | 2742          | 1.94%   | 2045          | 1.81%   |
|                  | 85-              | 702           | 0.50%   | 517           | 0.46%   |
|                  | 90-              | 132           | 0.09%   | 92            | 0.08%   |
| 95-              | 25               | 0.02%         | 19      | 0.02%         |         |
| 100+             | 1                | 0.00%         | 1       | 0.00%         |         |
| <b>Total</b>     |                  | <b>141583</b> |         | <b>112964</b> |         |
| <b>Education</b> | A-levels         | 13620         | 9.62%   | 10570         | 9.36%   |
|                  | Degree           | 46632         | 32.94%  | 37963         | 33.61%  |
|                  | GCSE<5           | 3311          | 2.34%   | 2517          | 2.23%   |
|                  | GCSE>5           | 11433         | 8.08%   | 8827          | 7.81%   |
|                  | Higher Education | 10741         | 7.59%   | 8441          | 7.47%   |
|                  | None             | 2883          | 2.04%   | 2107          | 1.87%   |
|                  | Other            | 5276          | 3.73%   | 4102          | 3.63%   |
|                  | unknown          | 47687         | 33.68%  | 38437         | 34.03%  |

|                                               |                    |        |        |        |        |
|-----------------------------------------------|--------------------|--------|--------|--------|--------|
|                                               |                    |        |        |        |        |
| <b>Sex</b>                                    | Female             | 85193  | 60.17% | 68230  | 60.40% |
|                                               | Male               | 56384  | 39.82% | 44729  | 39.60% |
|                                               | Unknown            | 6      | 0.00%  | 5      | 0.00%  |
|                                               |                    |        |        |        |        |
| <b>Ethnicity and race</b>                     | Asian              | 3205   | 2.26%  | 2351   | 2.08%  |
|                                               | Black              | 884    | 0.62%  | 635    | 0.56%  |
|                                               | Mixed              | 1611   | 1.14%  | 1277   | 1.13%  |
|                                               | Other              | 888    | 0.63%  | 675    | 0.60%  |
|                                               | Unknown            | 1316   | 0.93%  | 1010   | 0.89%  |
|                                               | White              | 133679 | 94.42% | 107016 | 94.73% |
|                                               |                    |        |        |        |        |
| <b>Index of Multiple Deprivation Quintile</b> | 1 (most deprived)  | 10912  | 7.71%  | 8480   | 7.51%  |
|                                               | 2                  | 20380  | 14.39% | 16034  | 14.19% |
|                                               | 3                  | 29635  | 20.93% | 23564  | 20.86% |
|                                               | 4                  | 35267  | 24.91% | 28273  | 25.03% |
|                                               | 5 (most affluent)  | 42136  | 29.76% | 34031  | 30.13% |
|                                               | Unknown            | 3253   | 2.30%  | 2582   | 2.29%  |
|                                               |                    |        |        |        |        |
| <b>Illness Duration</b>                       | 4-12 weeks         | 4065   | 2.87%  | 3246   | 2.87%  |
|                                               | >=12 unresolved    | 3103   | 2.19%  | 2580   | 2.28%  |
|                                               | >=12 resolved      | 1692   | 1.20%  | 1350   | 1.20%  |
|                                               | Asymptomatic       | 3800   | 2.68%  | 2947   | 2.61%  |
|                                               | No-Covid-19        | 58173  | 41.09% | 46261  | 40.95% |
|                                               | <4 weeks resolved  | 57480  | 40.60% | 45879  | 40.61% |
|                                               | Unknown            | 13270  | 9.37%  | 10701  | 9.47%  |
|                                               |                    |        |        |        |        |
| <b>Variant period</b>                         | Wild               | 7912   | 9.49%  | 6251   | 9.37%  |
|                                               | Alpha              | 6102   | 7.32%  | 4812   | 7.21%  |
|                                               | Delta              | 14942  | 17.91% | 11838  | 17.75% |
|                                               | Omicron            | 53790  | 64.49% | 43323  | 64.95% |
|                                               | Unknown            | 664    | 0.80%  | 479    | 0.72%  |
|                                               |                    |        |        |        |        |
| <b>Vaccines</b>                               | 0                  | 96425  | 68.10% | 77013  | 68.17% |
|                                               | 1                  | 989    | 0.70%  | 731    | 0.65%  |
|                                               | 2                  | 44169  | 31.20% | 35220  | 31.18% |
|                                               |                    |        |        |        |        |
| <b>Hospital</b>                               | ED                 | 868    | 0.61%  | 672    | 0.59%  |
|                                               | Hospital admission | 649    | 0.46%  | 527    | 0.47%  |
|                                               | ICU                | 282    | 0.20%  | 228    | 0.20%  |

GCSE General Certificate of Secondary Education  
ED Emergency Department visit  
ICU Intensive Care Unit



**Table S4d. Representativeness of study participants**

| <b>Disease under investigation</b>              | <b>Cognitive deficits in people who have survived Covid-19</b>                                                                                                                                                                                                                                                                                                                                                                                                                                                                                                                                                                                                                                                                                                                                                                                                                                                                                      |
|-------------------------------------------------|-----------------------------------------------------------------------------------------------------------------------------------------------------------------------------------------------------------------------------------------------------------------------------------------------------------------------------------------------------------------------------------------------------------------------------------------------------------------------------------------------------------------------------------------------------------------------------------------------------------------------------------------------------------------------------------------------------------------------------------------------------------------------------------------------------------------------------------------------------------------------------------------------------------------------------------------------------|
| <b>Special considerations related to:</b>       |                                                                                                                                                                                                                                                                                                                                                                                                                                                                                                                                                                                                                                                                                                                                                                                                                                                                                                                                                     |
| <b>Sex and gender</b>                           | Research indicates that Covid 19 affects males and females differently in the UK as elsewhere, with males more likely to have severe disease, be hospitalized and to die. <sup>1</sup> Females are more likely to report persistent ongoing symptoms consistent with Long Covid. <sup>2</sup>                                                                                                                                                                                                                                                                                                                                                                                                                                                                                                                                                                                                                                                       |
| <b>Age</b>                                      | Older adults are substantially more likely than younger people to develop severe acute Covid-19 symptoms, be hospitalized or die from Covid-19. <sup>3</sup> Self-reported Long Covid is more likely in people aged 35 to 69 in the UK. <sup>4</sup>                                                                                                                                                                                                                                                                                                                                                                                                                                                                                                                                                                                                                                                                                                |
| <b>Race or ethnic group</b>                     | People from minority ethnic groups were disproportionately affected by Covid-19 in the UK, particularly in the first year, being more likely to have infection and to be hospitalized. <sup>5,6</sup>                                                                                                                                                                                                                                                                                                                                                                                                                                                                                                                                                                                                                                                                                                                                               |
| <b>Geography</b>                                | Death rates early in the pandemic were twice as high amongst people living in urban and deprived areas of the UK. <sup>7</sup> People living in deprived areas also are more likely to report persistent symptoms consistent with Long Covid. <sup>8</sup> Increased rates of severe illness and death among males and older adults are a global characteristic of Covid-19; however, it has been reported that the sex differences vary geographically, e.g., in the US state by state; therefore, they may reflect other mediating factors, e.g., higher rates of underlying health conditions that exacerbate the effects of Covid-19, engagement in riskier behavior regarding virus exposure and health-seeking behaviors, which vary across cultures. <sup>9</sup>                                                                                                                                                                            |
| <b>Other considerations</b>                     | People with severe cognitive outcomes from Covid-19 may not have been able to engage in the survey. People who died from Covid-19 are not accounted for in the analyses.                                                                                                                                                                                                                                                                                                                                                                                                                                                                                                                                                                                                                                                                                                                                                                            |
| <b>Overall representativeness of this study</b> | Biological sex, age and residential address were available from the recruitment database. Residential postcodes were used to generate social deprivation scores and expected ethnic distribution. Overall, the respondents in the present study compared to the baseline sample of 800,000 people showed small biases in response rates favoring females and people of white ethnic background, and with slightly lower participation among young people and those living in the most deprived areas. Multivariate modelling of potential confounders and propensity score matching, as well as stratification-based sensitivity analyses, were undertaken to address these imbalances. The large sample size means that adequate numbers are available in each of these demographic groups (e.g. by age, sex, ethnicity and race, region, deprivation) to contribute meaningfully to the comparative findings on cognitive performance post-Covid. |
| <b>Data sources</b>                             | The above information has been published by the Office for National Statistics, UK government and journal articles. It was identified via literature searches on PubMed and Google Scholar.                                                                                                                                                                                                                                                                                                                                                                                                                                                                                                                                                                                                                                                                                                                                                         |

**Table S5. Numbers of participants and linear model estimates (SD units) of global cognitive score per infection onset date**

**Counts**

| Infection date<br>(days from<br>Jan. 1, 2020) | Original virus |             | Alpha |             | Delta |             | Omicron |             |
|-----------------------------------------------|----------------|-------------|-------|-------------|-------|-------------|---------|-------------|
|                                               | Worst          | 1 infection | Worst | 1 infection | Worst | 1 infection | Worst   | 1 infection |
| 0-99                                          | 2,718          | 1,500       |       |             |       |             |         |             |
| 100-199                                       | 979            | 515         |       |             |       |             |         |             |
| 200-299                                       | 1,647          | 937         |       |             |       |             |         |             |
| 300-399                                       | 1,147          | 688         | 3,486 | 2,100       |       |             |         |             |
| 400-499                                       |                |             | 1,430 | 1,090       | 124   | 96          |         |             |
| 500-599                                       |                |             |       |             | 2,299 | 1,638       |         |             |
| 600-699                                       |                |             |       |             | 5,051 | 3,903       |         |             |
| 700-799                                       |                |             |       |             | 4,541 | 3,905       | 11,019  | 10,215      |
| 800-899                                       |                |             |       |             |       |             | 17,785  | 17,529      |
| 900-999                                       |                |             |       |             |       |             | 12,374  | 12,368      |
| 1000-1099                                     |                |             |       |             |       |             | 1,624   | 1,624       |

**Estimates**

| Infection date<br>(days from Jan.<br>1, 2020) | G single confirmed infection |       | G residual |       |
|-----------------------------------------------|------------------------------|-------|------------|-------|
|                                               | Mean                         | SEM   | Mean       | SEM   |
| 0-99                                          | -0.133                       | 0.027 | 0.001      | 0.027 |
| 100-199                                       | -0.235                       | 0.046 | -0.130     | 0.046 |
| 200-299                                       | -0.069                       | 0.034 | 0.043      | 0.034 |
| 300-399                                       | -0.102                       | 0.019 | 0.018      | 0.019 |
| 400-499                                       | -0.138                       | 0.029 | -0.032     | 0.029 |
| 500-599                                       | -0.097                       | 0.025 | -0.049     | 0.025 |
| 600-699                                       | -0.033                       | 0.016 | 0.012      | 0.016 |
| 700-799                                       | -0.010                       | 0.008 | -0.025     | 0.008 |
| 800-899                                       | 0.054                        | 0.008 | 0.023      | 0.008 |
| 900-999                                       | 0.030                        | 0.009 | 0.003      | 0.009 |
| 1000-1099                                     | 0.008                        | 0.026 | -0.029     | 0.026 |
| No-Covid-19                                   | 0.014                        | 0.005 | 0.014      | 0.005 |
| <b>ANOVA</b>                                  |                              |       |            |       |
| DF                                            | (10,58097)                   |       | (10,58097) |       |
| F                                             | 19.4                         |       | 3.67       |       |
| p                                             | <0.001                       |       | <0.001     |       |

**Upper.** Counts for participants by worst (longest duration) episode and for single episode, by date of infection (days from Jan. 1, 2020). **Lower.** Mean cognitive score by date of infection for single Covid-19 episode cases, before (G) and after (G residual) adjusting for covariates: illness duration, variant period, emergency department visit or hospital admission and vaccination status at the time of infection. SEM=standard error of the mean. Statistics from one way ANOVA across time categories.

**Table S6. Probability distributions for global cognitive score score by variant period, illness duration and emergency department visit or hospital admission / other medical assistance**

**Variant period**

| SD  | Original virus | Alpha | Delta | Omicron | No-Covid-19 |
|-----|----------------|-------|-------|---------|-------------|
| <-3 | 0.003          | 0.003 | 0.001 | 0.001   | 0.001       |
| <-2 | 0.035          | 0.030 | 0.024 | 0.018   | 0.021       |
| <-1 | 0.155          | 0.154 | 0.144 | 0.133   | 0.132       |
| <0  | 0.354          | 0.357 | 0.344 | 0.336   | 0.342       |
| <1  | 0.310          | 0.324 | 0.332 | 0.348   | 0.344       |
| <2  | 0.124          | 0.116 | 0.133 | 0.140   | 0.137       |
| <3  | 0.017          | 0.016 | 0.021 | 0.023   | 0.022       |
| >3  | 0.002          | 0.000 | 0.001 | 0.001   | 0.001       |

**Illness duration**

| SD  | >= 12 weeks unresolved | >= 12 weeks resolved | 4-12 weeks | <4 weeks | Asymptomatic | No-Covid-19 |
|-----|------------------------|----------------------|------------|----------|--------------|-------------|
| <-3 | 0.004                  | 0.002                | 0.005      | 0.001    | 0.001        | 0.001       |
| <-2 | 0.048                  | 0.033                | 0.023      | 0.021    | 0.021        | 0.021       |
| <-1 | 0.173                  | 0.154                | 0.146      | 0.137    | 0.135        | 0.132       |
| <0  | 0.375                  | 0.338                | 0.356      | 0.338    | 0.337        | 0.342       |
| <1  | 0.282                  | 0.338                | 0.331      | 0.344    | 0.324        | 0.344       |
| <2  | 0.105                  | 0.117                | 0.121      | 0.136    | 0.157        | 0.137       |
| <3  | 0.013                  | 0.016                | 0.018      | 0.021    | 0.025        | 0.022       |
| >3  | 0.000                  | 0.002                | 0.001      | 0.001    | 0.000        | 0.001       |

**Hospital/ other medical assistance**

| SD  | Intensive care | Hospital admission | ED    | Other medical | No medical | No-Covid-19 |
|-----|----------------|--------------------|-------|---------------|------------|-------------|
| <-3 | 0.013          | 0.010              | 0.009 | 0.002         | 0.001      | 0.001       |
| <-2 | 0.066          | 0.055              | 0.046 | 0.029         | 0.019      | 0.021       |
| <-1 | 0.241          | 0.175              | 0.219 | 0.160         | 0.131      | 0.132       |
| <0  | 0.355          | 0.414              | 0.350 | 0.341         | 0.340      | 0.342       |
| <1  | 0.215          | 0.258              | 0.258 | 0.326         | 0.346      | 0.344       |
| <2  | 0.096          | 0.083              | 0.106 | 0.123         | 0.140      | 0.137       |
| <3  | 0.013          | 0.004              | 0.012 | 0.018         | 0.022      | 0.022       |
| >3  | 0.000          | 0.002              | 0.001 | 0.001         | 0.001      | 0.001       |

Performance <-1SDs from the population mean when correcting for age and education level is considered below average. Performance <-0.2SDs is considered indicative of moderate cognitive impairment. <-3SDs is considered indicative of profound cognitive impairment. Other medical = called NHS 111 helpline, or sought help from pharmacist, GP or walk-in centre.

**Table S7. Linear modelling of main effects in relation to global cognitive score in SD units**

| Coefficients             |          |       |        | 95% CI |        |
|--------------------------|----------|-------|--------|--------|--------|
|                          | Estimate | SE    | tStat  | Lower  | Upper  |
| (Intercept)              | 0.226    | 0.073 | 3.114  | 0.083  | 0.369  |
| No-Covid-19 (ref)        | 0        | na    | na     | na     | na     |
| Asymptomatic             | -0.168   | 0.054 | -3.119 | -0.274 | -0.062 |
| <4 weeks                 | -0.225   | 0.051 | -4.423 | -0.325 | -0.125 |
| 4-12 weeks resolved      | -0.255   | 0.055 | -4.659 | -0.363 | -0.147 |
| >=12 weeks resolved      | -0.238   | 0.060 | -4.005 | -0.356 | -0.120 |
| >=12 weeks unresolved    | -0.422   | 0.056 | -7.577 | -0.532 | -0.312 |
| ED                       | -0.247   | 0.044 | -5.559 | -0.333 | -0.161 |
| Hospital admission       | -0.334   | 0.050 | -6.720 | -0.432 | -0.236 |
| Intensive care           | -0.349   | 0.074 | -4.691 | -0.494 | -0.204 |
| Vaccine doses 1          | -0.130   | 0.043 | -3.054 | -0.214 | -0.046 |
| Vaccine doses >=2        | -0.057   | 0.014 | -4.078 | -0.084 | -0.030 |
| Variant - Original virus | 0.006    | 0.021 | 0.278  | -0.035 | 0.047  |
| Variant - Alpha (ref)    | 0        | na    | na     | na     | na     |
| Variant - Delta          | 0.100    | 0.020 | 4.886  | 0.061  | 0.139  |
| Variant - Omicron        | 0.167    | 0.019 | 8.682  | 0.130  | 0.204  |
| Variant - unknown        | -0.104   | 0.053 | -1.948 | -0.208 | 0.000  |
| AGE 18-19(ref)           | 0        | na    | na     | na     | na     |
| AGE 20-24                | 0.010    | 0.050 | 0.205  | -0.088 | 0.108  |
| AGE 25-29                | 0.002    | 0.047 | 0.048  | -0.090 | 0.094  |
| AGE 30-34                | -0.026   | 0.045 | -0.562 | -0.114 | 0.062  |
| AGE 35-39                | -0.027   | 0.044 | -0.604 | -0.113 | 0.059  |
| AGE 40-44                | -0.026   | 0.044 | -0.600 | -0.112 | 0.060  |
| AGE 45-49                | -0.029   | 0.043 | -0.660 | -0.113 | 0.055  |
| AGE 50-54                | -0.040   | 0.043 | -0.931 | -0.124 | 0.044  |
| AGE 55-59                | -0.046   | 0.043 | -1.083 | -0.130 | 0.038  |
| AGE 60-64                | -0.058   | 0.043 | -1.367 | -0.142 | 0.026  |
| AGE 65-69                | -0.066   | 0.043 | -1.541 | -0.150 | 0.018  |
| AGE 70-74                | -0.063   | 0.043 | -1.470 | -0.147 | 0.021  |
| AGE 75-79                | -0.058   | 0.044 | -1.322 | -0.144 | 0.028  |
| AGE 80-84                | -0.059   | 0.049 | -1.213 | -0.155 | 0.037  |
| AGE 85-89                | -0.078   | 0.065 | -1.193 | -0.205 | 0.049  |
| AGE 90-94                | -0.058   | 0.126 | -0.465 | -0.305 | 0.189  |
| AGE 95+                  | -0.007   | 0.262 | -0.029 | -0.521 | 0.507  |
| Sex female (ref)         | 0        | na    | na     | na     | na     |
| Sex - male               | -0.004   | 0.007 | -0.510 | -0.018 | 0.010  |
| Sex - unknown            | -0.064   | 0.548 | -0.117 | -1.138 | 1.010  |
| Asian (ref)              | 0        | na    | na     | na     | na     |
| Black                    | 0.004    | 0.051 | 0.071  | -0.096 | 0.104  |
| Mixed                    | -0.038   | 0.040 | -0.941 | -0.116 | 0.040  |
| Other                    | -0.010   | 0.050 | -0.198 | -0.108 | 0.088  |
| Unknown                  | -0.012   | 0.043 | -0.269 | -0.096 | 0.072  |
| White                    | -0.031   | 0.024 | -1.280 | -0.078 | 0.016  |

**Coefficients (continued)**

|                                     | Estimate | SE    | tStat  |        |       |
|-------------------------------------|----------|-------|--------|--------|-------|
| <b>Education - degree (ref)</b>     | 0        | na    | na     | na     | na    |
| <b>Education - higher</b>           | 0.018    | 0.014 | 1.293  | -0.009 | 0.045 |
| <b>Education Alevels</b>            | 0.019    | 0.013 | 1.468  | -0.006 | 0.044 |
| <b>Education - GCSE &gt;5</b>       | 0.021    | 0.014 | 1.489  | -0.006 | 0.048 |
| <b>Education - GCSE &lt;5</b>       | 0.009    | 0.024 | 0.376  | -0.038 | 0.056 |
| <b>Education -none</b>              | 0.010    | 0.026 | 0.399  | -0.041 | 0.061 |
| <b>Education - unknown</b>          | -0.013   | 0.011 | -1.187 | -0.035 | 0.009 |
| <b>Education - other</b>            | 0.035    | 0.019 | 1.795  | -0.002 | 0.072 |
| <b>IMD Q 1 (ref, most deprived)</b> | 0        | na    | na     | na     | na    |
| <b>IMD Q 2</b>                      | -0.012   | 0.015 | -0.762 | -0.041 | 0.017 |
| <b>IMD Q 3</b>                      | -0.022   | 0.015 | -1.470 | -0.051 | 0.007 |
| <b>IMD Q 4</b>                      | -0.023   | 0.014 | -1.570 | -0.050 | 0.004 |
| <b>IMD Q 5</b>                      | -0.017   | 0.014 | -1.188 | -0.044 | 0.010 |
| <b>IMD Q unknown</b>                | -0.028   | 0.026 | -1.076 | -0.079 | 0.023 |
| <b>Organ transplant</b>             | -0.021   | 0.104 | -0.198 | -0.225 | 0.183 |
| <b>Diabetes</b>                     | -0.005   | 0.020 | -0.269 | -0.044 | 0.034 |
| <b>Heart disease</b>                | -0.014   | 0.023 | -0.597 | -0.059 | 0.031 |
| <b>Hypertension</b>                 | -0.009   | 0.012 | -0.711 | -0.033 | 0.015 |
| <b>Stroke</b>                       | 0.003    | 0.046 | 0.056  | -0.087 | 0.093 |
| <b>Kidney failure</b>               | 0.021    | 0.049 | 0.423  | -0.075 | 0.117 |
| <b>Liver disease</b>                | 0.018    | 0.056 | 0.322  | -0.092 | 0.128 |
| <b>Anaemia</b>                      | -0.015   | 0.031 | -0.490 | -0.076 | 0.046 |
| <b>Allergy</b>                      | -0.020   | 0.012 | -1.646 | -0.044 | 0.004 |
| <b>Asthma</b>                       | 0.006    | 0.017 | 0.358  | -0.027 | 0.039 |
| <b>Other lung disease</b>           | -0.002   | 0.029 | -0.068 | -0.059 | 0.055 |
| <b>Cancer</b>                       | -0.015   | 0.025 | -0.600 | -0.064 | 0.034 |
| <b>Fibromyalgia</b>                 | 0.007    | 0.035 | 0.187  | -0.062 | 0.076 |
| <b>Epilepsy</b>                     | -0.022   | 0.059 | -0.372 | -0.138 | 0.094 |
| <b>Other brain/nerve</b>            | -0.003   | 0.040 | -0.065 | -0.081 | 0.075 |
| <b>Osteoarthritis</b>               | -0.006   | 0.015 | -0.397 | -0.035 | 0.023 |
| <b>Immunosupression</b>             | 0.001    | 0.022 | 0.026  | -0.042 | 0.044 |
| <b>Chronic infection</b>            | -0.019   | 0.105 | -0.183 | -0.225 | 0.187 |
| <b>Dementia</b>                     | -0.036   | 0.192 | -0.190 | -0.412 | 0.340 |
| <b>Anxiety</b>                      | -0.007   | 0.014 | -0.503 | -0.034 | 0.020 |
| <b>Depression</b>                   | -0.010   | 0.018 | -0.541 | -0.045 | 0.025 |
| <b>Other psych disease</b>          | -0.024   | 0.048 | -0.494 | -0.118 | 0.070 |
| <b>Rheumatoid arthritis</b>         | -0.004   | 0.027 | -0.155 | -0.057 | 0.049 |
| <b>Hypothyroid</b>                  | -0.007   | 0.020 | -0.341 | -0.046 | 0.032 |
| <b>Adrenal gland</b>                | -0.024   | 0.143 | -0.168 | -0.304 | 0.256 |
| <b>Sleep apnoea narco</b>           | 0.001    | 0.032 | 0.024  | -0.062 | 0.064 |
| <b>Other serious illness</b>        | 0.003    | 0.018 | 0.140  | -0.032 | 0.038 |

Ref=reference category. GCSE=General Certificate of Secondary Education, IMD=Index of Multiple Deprivation

**Table S8. Stepwise regression conducted with all main effects and 2-way interactions**

**Stepwise regression ANOVA**

|                        | SumSq   | DF     | MeanSq | F      |
|------------------------|---------|--------|--------|--------|
| Virus variant          | 148.790 | 4      | 37.197 | 31.020 |
| ED                     | 35.821  | 1      | 35.821 | 29.872 |
| Hospital admission     | 53.743  | 1      | 53.743 | 44.818 |
| Intensive care         | 26.686  | 1      | 26.686 | 22.254 |
| Covid illness duration | 118.040 | 5      | 23.609 | 19.688 |
| Error                  | 122640  | 102250 | 1.199  |        |

**Coefficients**

|                        | Estimate | SE    | tStat  | 95% CI |        |
|------------------------|----------|-------|--------|--------|--------|
|                        |          |       |        | Lower  | Upper  |
| (Intercept)            | 0.116    | 0.053 | 2.182  | 0.012  | 0.220  |
| Original virus         | 0.013    | 0.021 | 0.598  | -0.028 | 0.054  |
| Alpha (ref)            | 0.000    | na    | na     | na     | na     |
| Delta                  | 0.072    | 0.019 | 3.811  | 0.035  | 0.109  |
| Omicron                | 0.135    | 0.017 | 7.829  | 0.102  | 0.168  |
| Unknown variant        | -0.101   | 0.053 | -1.904 | -0.205 | 0.003  |
| No hospital            | 0.000    | na    | na     | na     | na     |
| ED                     | -0.243   | 0.044 | -5.466 | -0.329 | -0.157 |
| Hospital admission     | -0.333   | 0.050 | -6.695 | -0.431 | -0.235 |
| Intensive care         | -0.351   | 0.074 | -4.717 | -0.496 | -0.206 |
| No-Covid-19 (ref)      | 0.000    | na    | na     | na     | na     |
| Asymptomatic           | -0.157   | 0.054 | -2.920 | -0.263 | -0.051 |
| <4 weeks               | -0.212   | 0.051 | -4.191 | -0.312 | -0.112 |
| 4-12 weeks             | -0.241   | 0.055 | -4.414 | -0.349 | -0.133 |
| >= 12 weeks resolved   | -0.224   | 0.059 | -3.774 | -0.340 | -0.108 |
| >= 12 weeks unresolved | -0.404   | 0.055 | -7.281 | -0.512 | -0.296 |

Terms selected when using stepwise regression to identify those that explain sufficient variance in global cognitive score for analysis from amongst all main effects and 2-way interactions between (a) demographic variables, (b) proxies or mediators of severity and (c) preexisting conditions.

**Table S9. Main effect on global cognitive score in SD units and 95% Confidence Intervals of duration of symptoms for each variant period relative to the reference of No-Covid-19**

|                          | Estimate | N     | 95% CI |        |
|--------------------------|----------|-------|--------|--------|
|                          |          |       | Upper  | Lower  |
| <b>Original virus</b>    |          |       |        |        |
| (Intercept)              | 0.016    |       |        |        |
| >=12 weeks not resolved  | -0.322   | 732   | -0.249 | -0.395 |
| >=12 weeks resolved      | -0.130   | 604   | -0.050 | -0.210 |
| 4-12 weeks               | -0.146   | 798   | -0.075 | -0.217 |
| <4 weeks                 | -0.117   | 3579  | -0.084 | -0.150 |
| Asymptomatic             | 0.007    | 538   | 0.091  | -0.077 |
| <b>Alpha</b>             |          |       |        |        |
| (Intercept)              | 0.013    |       |        |        |
| >=12 weeks not resolved  | -0.330   | 433   | -0.236 | -0.424 |
| >=12 weeks resolved      | -0.126   | 307   | -0.014 | -0.238 |
| 4-12 weeks               | -0.180   | 520   | -0.094 | -0.266 |
| <4 weeks                 | -0.115   | 3224  | -0.080 | -0.150 |
| Asymptomatic             | -0.050   | 328   | 0.058  | -0.158 |
| <b>Delta</b>             |          |       |        |        |
| (Intercept)              | 0.010    |       |        |        |
| >=12 weeks not resolved  | -0.264   | 644   | -0.186 | -0.342 |
| >=12 weeks resolved      | -0.058   | 271   | 0.062  | -0.178 |
| 4-12 weeks               | -0.085   | 753   | -0.012 | -0.158 |
| <4 weeks                 | -0.036   | 9378  | -0.014 | -0.058 |
| Asymptomatic             | -0.028   | 792   | 0.043  | -0.099 |
| <b>Omicron</b>           |          |       |        |        |
| (Intercept)              | -0.007   |       |        |        |
| >=12 weeks not resolved  | -0.161   | 771   | -0.090 | -0.232 |
| >=12 weeks resolved      | -0.094   | 168   | 0.057  | -0.245 |
| 4-12 weeks               | -0.015   | 1175  | 0.044  | -0.074 |
| <4 weeks                 | 0.020    | 29283 | 0.034  | 0.006  |
| Asymptomatic             | 0.081    | 1231  | 0.138  | 0.024  |
| <b>No-Covid-19 (ref)</b> |          | 46261 |        |        |

**Table S10. Contrasting global cognitive score (in SD units with 95% Confidence Intervals) for each cell of the variant period \* illness duration factorial with No-Covid-19 after propensity score matching**

| <b>Propensity score</b>                              |                       |              |              |                |                       |              |              |                |  |
|------------------------------------------------------|-----------------------|--------------|--------------|----------------|-----------------------|--------------|--------------|----------------|--|
| <b>Matched without reported cognitive symptoms</b>   |                       |              |              |                |                       |              |              |                |  |
| <b>Matched including reported cognitive symptoms</b> |                       |              |              |                |                       |              |              |                |  |
|                                                      | <b>Original virus</b> | <b>Alpha</b> | <b>Delta</b> | <b>Omicron</b> | <b>Original virus</b> | <b>Alpha</b> | <b>Delta</b> | <b>Omicron</b> |  |
| <b>Match pre (Cohen's D')</b>                        |                       |              |              |                |                       |              |              |                |  |
| Asymptomatic                                         | -1.680                | -1.653       | -1.594       | -1.401         | -1.734                | -1.657       | -1.603       | -1.412         |  |
| >4 Weeks                                             | 1.485                 | 1.502        | 1.370        | 1.230          | 1.664                 | 1.619        | 1.410        | 1.246          |  |
| 4-12 Weeks                                           | -1.681                | -1.738       | -1.931       | -1.572         | -2.384                | -2.177       | -2.316       | -1.829         |  |
| >=12 Weeks Resolved                                  | -1.713                | -1.807       | -1.824       | -1.574         | -2.134                | -2.108       | -2.186       | -1.900         |  |
| >= 12 Weeks Unresolved                               | -1.796                | -1.973       | -1.978       | -1.703         | -3.010                | -3.424       | -2.949       | -2.781         |  |
| <b>Match post (Cohen's D')</b>                       |                       |              |              |                |                       |              |              |                |  |
| Asymptomatic                                         | -0.008                | -0.030       | -0.022       | -0.003         | -0.041                | -0.040       | -0.005       | -0.010         |  |
| >4 Weeks                                             | 0.000                 | 0.001        | 0.000        | 0.000          | 0.001                 | 0.003        | 0.001        | 0.000          |  |
| 4-12 Weeks                                           | -0.006                | -0.005       | -0.011       | -0.011         | -0.008                | -0.023       | -0.009       | -0.009         |  |
| >=12 Weeks Resolved                                  | -0.010                | -0.029       | -0.090       | -0.130         | -0.009                | -0.043       | -0.047       | -0.217         |  |
| >= 12 Weeks Unresolved                               | -0.013                | -0.021       | -0.003       | -0.025         | -0.002                | -0.029       | -0.010       | -0.002         |  |
| <b>N per group</b>                                   |                       |              |              |                |                       |              |              |                |  |
| Asymptomatic                                         | 538                   | 327          | 792          | 1231           | 536                   | 327          | 792          | 1231           |  |
| >4 Weeks                                             | 3574                  | 3224         | 8811         | 16793          | 3532                  | 3193         | 8471         | 16791          |  |
| 4-12 Weeks                                           | 798                   | 520          | 750          | 1175           | 786                   | 520          | 750          | 1174           |  |
| >=12 Weeks Resolved                                  | 603                   | 307          | 271          | 168            | 603                   | 307          | 271          | 168            |  |
| >= 12 Weeks Unresolved                               | 731                   | 430          | 644          | 771            | 726                   | 428          | 643          | 768            |  |
| <b>Cognitive score G</b>                             |                       |              |              |                |                       |              |              |                |  |
| <b>Mean difference</b>                               | <b>Original virus</b> | <b>Alpha</b> | <b>Delta</b> | <b>Omicron</b> | <b>Original virus</b> | <b>Alpha</b> | <b>Delta</b> | <b>Omicron</b> |  |
| Asymptomatic                                         | -0.084                | -0.028       | -0.074       | 0.109          | -0.022                | -0.033       | -0.013       | 0.044          |  |
| >4 Weeks                                             | -0.136                | -0.097       | -0.030       | 0.015          | -0.123                | -0.100       | -0.024       | 0.028          |  |
| 4-12 Weeks                                           | -0.196                | -0.203       | -0.138       | -0.034         | -0.160                | -0.199       | -0.063       | 0.011          |  |
| >=12 Weeks Resolved                                  | -0.201                | -0.113       | -0.002       | -0.068         | -0.098                | 0.028        | -0.138       | -0.075         |  |
| >= 12 Weeks Unresolved                               | -0.318                | -0.275       | -0.289       | -0.141         | -0.361                | -0.309       | -0.274       | -0.092         |  |
| <b>Lower 95% CI</b>                                  |                       |              |              |                |                       |              |              |                |  |
| Asymptomatic                                         | -0.089                | -0.037       | -0.077       | 0.106          | -0.027                | -0.042       | -0.016       | 0.041          |  |
| >4 Weeks                                             | -0.137                | -0.098       | -0.031       | 0.015          | -0.124                | -0.101       | -0.024       | 0.028          |  |
| 4-12 Weeks                                           | -0.199                | -0.208       | -0.142       | -0.036         | -0.163                | -0.205       | -0.066       | 0.008          |  |
| >=12 Weeks Resolved                                  | -0.206                | -0.122       | -0.012       | -0.085         | -0.103                | 0.019        | -0.148       | -0.091         |  |
| >= 12 Weeks Unresolved                               | -0.322                | -0.282       | -0.294       | -0.145         | -0.365                | -0.315       | -0.278       | -0.096         |  |
| Asymptomatic                                         | -0.089                | -0.037       | -0.077       | 0.106          | -0.027                | -0.042       | -0.016       | 0.041          |  |
| FourWeeks                                            | -0.137                | -0.098       | -0.031       | 0.015          | -0.124                | -0.101       | -0.024       | 0.028          |  |
| fourToTwelveWeeks                                    | -0.199                | -0.208       | -0.142       | -0.036         | -0.163                | -0.205       | -0.066       | 0.008          |  |
| TwelveWeeksResolved                                  | -0.206                | -0.122       | -0.012       | -0.085         | -0.103                | 0.019        | -0.148       | -0.091         |  |
| <b>Upper 95% C.I</b>                                 |                       |              |              |                |                       |              |              |                |  |



|                       |        |        |        |        |        |        |        |        |
|-----------------------|--------|--------|--------|--------|--------|--------|--------|--------|
| Asymptomatic          | -0.079 | -0.019 | -0.070 | 0.111  | -0.016 | -0.025 | -0.009 | 0.046  |
| FourWeeks             | -0.135 | -0.097 | -0.030 | 0.015  | -0.123 | -0.099 | -0.023 | 0.028  |
| fourToTwelveWeeks     | -0.192 | -0.197 | -0.135 | -0.031 | -0.156 | -0.194 | -0.059 | 0.013  |
| TwelveWeeksResolved   | -0.196 | -0.104 | 0.008  | -0.052 | -0.093 | 0.037  | -0.127 | -0.058 |
| TwelveWeeksUnresolved | -0.314 | -0.268 | -0.284 | -0.137 | -0.357 | -0.302 | -0.269 | -0.088 |

Participants were propensity score matched then contrasted to the No-Covid-19 group independently for each combination of variant period and illness duration. Upper table is the contrast of propensity scores between groups. Match pre is the mean difference in propensity scores prior to matching the groups. Match post is the difference in the mean propensity scores of the groups after they have been matched. Lower table is the contrast of cognitive scores between the propensity score matched groups with 95% confidence interval (CI). Matched factors were: age group, sex, ethnicity and race, education level, index of multiple-deprivation, number of preexisting conditions, presence of subjective cognitive concerns (poor memory or “brain fog”).

**Table S11. Contrasting global cognitive score (in SD units with 95% Confidence Intervals) when propensity score matching the No-Covid-19 group, or those who did not seek medical assistance, with those who visited the emergency department or were admitted to hospital, or sought other medical assistance**

| Propensity score                    | S11a Hospital |                 |                       | S11b. Other medical assistance  |
|-------------------------------------|---------------|-----------------|-----------------------|---------------------------------|
|                                     | ED            | Admitted        | Intensive Care        |                                 |
| <b>Match pre (Cohen's D')</b>       |               |                 |                       |                                 |
| No-Covid-19                         | -1.557        | -1.459          | -1.524                | -1.261                          |
| Did not seek medical assistance     | -2.139        | -2.31           | -3.759                | -0.524                          |
| <b>Match post (Cohen's D')</b>      |               |                 |                       |                                 |
| No-Covid-19                         | -0.013        | -0.027          | -0.051                | 0                               |
| Did not seek medical assistance     | -0.017        | -0.013          | -0.019                | -0.001                          |
| <b>N per group</b>                  |               |                 |                       |                                 |
| No-Covid-19                         | 631           | 499             | 221                   | 10773                           |
| Did not seek medical assistance     | 668           | 525             | 220                   | 14402                           |
| <b>Cognitive score G</b>            |               |                 |                       |                                 |
| <b>Mean difference</b>              | <b>ED</b>     | <b>Admitted</b> | <b>Intensive Care</b> | <b>Other medical assistance</b> |
| vs. No-Covid-19                     | -0.312        | -0.347          | -0.63                 | -0.124                          |
| vs. Did not seek medical assistance | -0.338        | -0.34           | -0.445                | -0.115                          |
| <b>Lower 95%CI</b>                  |               |                 |                       |                                 |
| No-Covid-19                         | -0.151        | -0.43           | -0.473                | -0.837                          |
| Did not seek medical assistance     | -0.142        | -0.457          | -0.469                | -0.64                           |
| <b>Upper 95% CI</b>                 |               |                 |                       |                                 |
| No-Covid-19                         | -0.097        | -0.194          | -0.221                | -0.422                          |
| Did not seek medical assistance     | -0.088        | -0.22           | -0.211                | -0.25                           |

a. Participants were propensity score matched from the No-Covid-19 group and the 'did not seek medical assistance' group for each hospital group independently. 'Did not seek medical assistance' comprises people who had SARS-CoV-2 infection and did not visit the hospital or seek assistance by calling NHS 111, contacting their GP or going to a walk-in medical centre. Upper table is the contrast of propensity scores between groups. Match pre is the mean difference in propensity scores prior to matching the groups. Match post is the difference in the mean propensity scores of the groups after they have been matched. Lower table is the contrast of global cognitive scores between the propensity matched groups with 95% confidence interval (CI). Matched factors were: age group, sex, ethnicity and race, education level, index of multiple-deprivation, number of preexisting conditions, variant period, vaccination status and illness-duration. b. The analysis was extended to include a further group 'Other medical assistance', comprising people who sought assistance by calling NHS 111, contacting their GP or going to a walk-in medical centre.

**Table S12. Propensity score matching analysis for people who had different numbers of valid vaccine doses prior to their worst (longest duration) Covid-19 illness and whose first two doses were AstraZeneca vs Pfizer**

| <b>Propensity score</b>        |                |                    |                  |
|--------------------------------|----------------|--------------------|------------------|
|                                | <b>Doses</b>   |                    |                  |
|                                | <b>1 vs. 0</b> | <b>&gt;1 vs. 0</b> | <b>AZ-Pfizer</b> |
| <b>Match pre (Cohen's D')</b>  | -3.7187        | -1.9408            | -1.3411          |
| <b>Match post (Cohen's D')</b> | -0.0026        | -0.0034            | 0.0018           |
| <b>N per group</b>             | 611            | 877                | 13539            |

  

| <b>Cognitive score G</b> |                |                    |                  |
|--------------------------|----------------|--------------------|------------------|
|                          | <b>Doses</b>   |                    |                  |
|                          | <b>1 vs. 0</b> | <b>&gt;1 vs. 0</b> | <b>AZ-Pfizer</b> |
| <b>Estimate</b>          | 0.0754         | 0.1479             | -0.0694          |
| <b>Lower 95% CI</b>      | -0.0369        | 0.0483             | -0.0935          |
| <b>Upper 95% CI</b>      | 0.1877         | 0.2475             | -0.0453          |

Participants who had either one or more than one vaccine doses prior to their worst illness were propensity score matched to participants who had no vaccination prior to their worst Covid-19 illness. People who had Covid-19 and who had received two or more doses of either AstraZeneca or Pfizer vaccine as their first vaccinations were also propensity score matched against each other. Factors included in the propensity score matching model were demographics, variant period and number of pre-existing conditions. Upper table is the contrast of propensity scores (SD units) between groups. Match pre is the mean difference in propensity scores prior to matching the groups. Match post is the difference in the mean propensity scores of the groups after they have been matched. Lower table is the contrast of global cognitive scores (SD units) between the propensity matched groups with 95% confidence interval (CI)

**Table S13. Propensity score matching analysis for people who had one Covid-19 episode vs multiple episodes**

**Propensity score**

|                         | Matched for other covariates |       |
|-------------------------|------------------------------|-------|
|                         | No                           | Yes   |
| Match pre (Cohen's D')  | 0.414                        | 1.094 |
| Match post (Cohen's D') | 0.005                        | 0.002 |
| N per group             | 9114                         | 8965  |

**Cognitive score G**

|              | Matched for other covariates |        |
|--------------|------------------------------|--------|
|              | No                           | Yes    |
| Estimate     | -0.112                       | -0.024 |
| Lower 95% CI | -0.142                       | -0.054 |
| Upper 95% CI | -0.083                       | 0.006  |

Participants who had either one or more than one Covid-19 episodes were propensity score matched for demographics and number of preexisting conditions, and then including other covariates - variant period, vaccination status and emergency department visit or hospital admission. Upper table is the contrast of propensity scores (SD units) between groups. Match pre is the mean difference in propensity scores prior to matching the groups. Match post is the difference in the mean propensity scores of the groups after they have been matched. Lower table is the contrast of global cognitive scores (SD units) between the propensity matched groups with 95% confidence interval (CI)

**Table S14. Associations of specific task summary scores (SD units) with post-Covid covariates**

**a. In 102,263 participants who completed all tasks and were not within 12 weeks of infection**

|                                     |          | Intercept | Original virus (ref) | Alpha  | Delta | Omicron | No hospital (ref) | ED     | Hospital admission | Intensive Care |
|-------------------------------------|----------|-----------|----------------------|--------|-------|---------|-------------------|--------|--------------------|----------------|
| Spatial Planning                    | Estimate | 0.006     | 0                    | 0.037  | 0.076 | 0.130   | 0                 | -0.101 | -0.235             | -0.334         |
|                                     | Upper    |           |                      | 0.074  | 0.107 | 0.157   |                   | -0.023 | -0.147             | -0.201         |
|                                     | Lower    |           |                      | 0.000  | 0.045 | 0.103   |                   | -0.179 | -0.323             | -0.467         |
| Information Sampling                | Estimate | 0.007     | 0                    | 0.006  | 0.028 | 0.042   | 0                 | -0.070 | -0.078             | -0.069         |
|                                     | Upper    |           |                      | 0.043  | 0.059 | 0.069   |                   | 0.010  | 0.010              | 0.064          |
|                                     | Lower    |           |                      | -0.031 | 0.003 | 0.015   |                   | -0.150 | -0.166             | -0.202         |
| 2D Mental Manipulation              | Estimate | -0.002    | 0                    | -0.018 | 0.052 | 0.045   | 0                 | -0.097 | -0.174             | -0.435         |
|                                     | Upper    |           |                      | 0.019  | 0.083 | 0.072   |                   | -0.017 | -0.086             | -0.302         |
|                                     | Lower    |           |                      | -0.055 | 0.021 | 0.018   |                   | -0.177 | -0.262             | -0.568         |
| Delayed Memory                      | Estimate | 0.017     | 0                    | 0.000  | 0.051 | 0.100   | 0                 | -0.192 | -0.212             | -0.211         |
|                                     | Upper    |           |                      | 0.037  | 0.082 | 0.127   |                   | -0.114 | -0.124             | -0.078         |
|                                     | Lower    |           |                      | -0.037 | 0.020 | 0.073   |                   | -0.270 | -0.300             | -0.344         |
| Immediate Memory                    | Estimate | 0.012     | 0                    | -0.010 | 0.034 | 0.080   | 0                 | -0.188 | -0.291             | -0.268         |
|                                     | Upper    |           |                      | 0.027  | 0.065 | 0.107   |                   | -0.110 | -0.203             | -0.135         |
|                                     | Lower    |           |                      | -0.047 | 0.003 | 0.053   |                   | -0.266 | -0.379             | -0.401         |
| Spatial Working Memory Maximum Span | Estimate | 0.008     | 0                    | 0.014  | 0.050 | 0.048   | 0                 | -0.126 | -0.209             | -0.231         |
|                                     | Upper    |           |                      | 0.051  | 0.081 | 0.075   |                   | -0.046 | -0.121             | -0.098         |
|                                     | Lower    |           |                      | -0.023 | 0.019 | 0.021   |                   | -0.206 | -0.297             | -0.364         |
| Verbal Analogical Reasoning         | Estimate | -0.002    | 0                    | -0.012 | 0.106 | 0.143   | 0                 | -0.131 | -0.189             | -0.319         |
|                                     | Upper    |           |                      | 0.025  | 0.137 | 0.170   |                   | -0.053 | -0.101             | -0.186         |
|                                     | Lower    |           |                      | -0.049 | 0.075 | 0.116   |                   | -0.209 | -0.277             | -0.452         |
| Word Definitions                    | Estimate | 0.009     | 0                    | -0.009 | 0.092 | 0.173   | 0                 | -0.085 | -0.146             | -0.271         |
|                                     | Upper    |           |                      | 0.028  | 0.123 | 0.200   |                   | -0.007 | -0.058             | -0.138         |
|                                     | Lower    |           |                      | -0.046 | 0.061 | 0.146   |                   | -0.163 | -0.234             | -0.404         |

**a continued**

|                                     |          | No-Covid-19 (ref) | Asymptomatic | <4 weeks | 4-12 Weeks | >12 Weeks Resolved | >12 Weeks Ongoing |
|-------------------------------------|----------|-------------------|--------------|----------|------------|--------------------|-------------------|
| Spatial Planning                    | Estimate | 0                 | -0.064       | -0.097   | -0.115     | -0.127             | -0.198            |
|                                     | Upper    |                   | -0.021       | -0.070   | -0.074     | -0.070             | -0.153            |
|                                     | Lower    |                   | -0.107       | -0.124   | -0.156     | -0.184             | -0.243            |
| Information Sampling                | Estimate | 0                 | -0.044       | -0.041   | -0.040     | -0.047             | -0.068            |
|                                     | Upper    |                   | -0.001       | -0.014   | 0.001      | 0.010              | -0.023            |
|                                     | Lower    |                   | -0.087       | -0.068   | -0.081     | -0.104             | -0.113            |
| 2D Mental Manipulation              | Estimate | 0                 | 0.042        | -0.025   | -0.056     | -0.040             | -0.106            |
|                                     | Upper    |                   | 0.085        | 0.002    | -0.015     | 0.017              | -0.061            |
|                                     | Lower    |                   | -0.001       | -0.052   | -0.097     | -0.097             | -0.151            |
| Delayed Memory                      | Estimate | 0                 | -0.051       | -0.090   | -0.105     | -0.094             | -0.225            |
|                                     | Upper    |                   | -0.008       | -0.063   | -0.064     | -0.037             | -0.180            |
|                                     | Lower    |                   | -0.094       | -0.117   | -0.146     | -0.151             | -0.270            |
| Immediate Memory                    | Estimate | 0                 | -0.015       | -0.064   | -0.085     | -0.068             | -0.221            |
|                                     | Upper    |                   | 0.028        | -0.037   | -0.044     | -0.011             | -0.176            |
|                                     | Lower    |                   | -0.058       | -0.091   | -0.126     | -0.125             | -0.266            |
| Spatial Working Memory Maximum Span | Estimate | 0                 | 0.031        | -0.048   | -0.103     | -0.033             | -0.121            |
|                                     | Upper    |                   | 0.074        | -0.021   | -0.062     | 0.024              | -0.076            |
|                                     | Lower    |                   | -0.012       | -0.075   | -0.144     | -0.090             | -0.166            |

|                             |          |   |        |        |        |        |        |
|-----------------------------|----------|---|--------|--------|--------|--------|--------|
| Verbal Analogical Reasoning | Estimate | 0 | -0.094 | -0.087 | -0.118 | -0.107 | -0.210 |
|                             | Upper    |   | -0.051 | -0.060 | -0.077 | -0.050 | -0.165 |
|                             | Lower    |   | -0.137 | -0.114 | -0.159 | -0.164 | -0.255 |
| Word Definitions            | Estimate | 0 | -0.149 | -0.127 | -0.120 | -0.121 | -0.224 |
|                             | Upper    |   | -0.106 | -0.100 | -0.079 | -0.064 | -0.179 |
|                             | Lower    |   | -0.192 | -0.154 | -0.161 | -0.178 | -0.269 |

**b. In all 141,583 participants who completed at least one task**

|                                     |          | Intercept | Original virus (ref) | Alpha  | Delta | Omicron | No hospital (ref) | ED     | Hospital admission | Intensive Care |
|-------------------------------------|----------|-----------|----------------------|--------|-------|---------|-------------------|--------|--------------------|----------------|
| Spatial Planning                    | Estimate | 0.009     | 0                    | 0.041  | 0.084 | 0.140   | 0                 | -0.127 | -0.232             | -0.352         |
|                                     | Upper    |           |                      | 0.076  | 0.113 | 0.165   |                   | -0.054 | -0.148             | -0.227         |
|                                     | Lower    |           |                      | 0.006  | 0.055 | 0.115   |                   | -0.200 | -0.316             | -0.477         |
|                                     | N        | 120867    |                      |        |       |         |                   |        |                    |                |
| Information Sampling                | Estimate | 0.008     | 0                    | 0.007  | 0.032 | 0.045   | 0                 | -0.063 | -0.086             | -0.101         |
|                                     | Upper    |           |                      | 0.044  | 0.061 | 0.072   |                   | 0.013  | 0.000              | 0.028          |
|                                     | Lower    |           |                      | -0.030 | 0.003 | 0.018   |                   | -0.139 | -0.172             | -0.230         |
|                                     | N        | 115380    |                      |        |       |         |                   |        |                    |                |
| 2D Mental Manipulation              | Estimate | 0.001     | 0                    | 0.005  | 0.062 | 0.056   | 0                 | -0.129 | -0.157             | -0.363         |
|                                     | Upper    |           |                      | 0.038  | 0.089 | 0.081   |                   | -0.060 | -0.077             | -0.243         |
|                                     | Lower    |           |                      | -0.028 | 0.035 | 0.031   |                   | -0.198 | -0.237             | -0.483         |
|                                     | N        | 136392    |                      |        |       |         |                   |        |                    |                |
| Delayed Memory                      | Estimate | 0.015     | 0                    | 0.001  | 0.051 | 0.100   | 0                 | -0.203 | -0.199             | -0.211         |
|                                     | Upper    |           |                      | 0.038  | 0.082 | 0.127   |                   | -0.127 | -0.113             | -0.080         |
|                                     | Lower    |           |                      | -0.036 | 0.020 | 0.073   |                   | -0.279 | -0.285             | -0.342         |
|                                     | N        | 112964    |                      |        |       |         |                   |        |                    |                |
| Immediate Memory                    | Estimate | 0.012     | 0                    | -0.005 | 0.050 | 0.094   | 0                 | -0.192 | -0.253             | -0.266         |
|                                     | Upper    |           |                      | 0.028  | 0.077 | 0.118   |                   | -0.125 | -0.175             | -0.148         |
|                                     | Lower    |           |                      | -0.038 | 0.023 | 0.070   |                   | -0.259 | -0.331             | -0.384         |
|                                     | N        | 141582    |                      |        |       |         |                   |        |                    |                |
| Spatial Working Memory Maximum Span | Estimate | 0.007     | 0                    | 0.006  | 0.056 | 0.052   | 0                 | -0.156 | -0.196             | -0.215         |
|                                     | Upper    |           |                      | 0.041  | 0.083 | 0.077   |                   | -0.085 | -0.114             | -0.093         |
|                                     | Lower    |           |                      | -0.029 | 0.029 | 0.027   |                   | -0.227 | -0.278             | -0.337         |
|                                     | N        | 129543    |                      |        |       |         |                   |        |                    |                |
| Verbal Analogical Reasoning         | Estimate | -0.002    | 0                    | -0.003 | 0.117 | 0.157   | 0                 | -0.132 | -0.208             | -0.329         |
|                                     | Upper    |           |                      | 0.032  | 0.146 | 0.182   |                   | -0.059 | -0.124             | -0.202         |
|                                     | Lower    |           |                      | -0.038 | 0.088 | 0.132   |                   | -0.205 | -0.292             | -0.456         |
|                                     | N        | 119751    |                      |        |       |         |                   |        |                    |                |
| Word Definitions                    | Estimate | 0.006     | 0                    | -0.006 | 0.095 | 0.178   | 0                 | -0.107 | -0.141             | -0.266         |
|                                     | Upper    |           |                      | 0.029  | 0.124 | 0.205   |                   | -0.033 | -0.057             | -0.137         |
|                                     | Lower    |           |                      | -0.041 | 0.066 | 0.151   |                   | -0.181 | -0.225             | -0.395         |
|                                     | N        |           |                      |        |       |         |                   |        |                    |                |

**b continued**

|                        |          | No-Covid-19 (ref) | Asymptomatic | <4 weeks | 4-12 Weeks | >12 Weeks Resolved | >12 Weeks Ongoing | <12 weeks since infection |
|------------------------|----------|-------------------|--------------|----------|------------|--------------------|-------------------|---------------------------|
| Spatial Planning       | Estimate | 0                 | -0.078       | -0.110   | -0.132     | -0.113             | -0.211            | -0.143                    |
|                        | Upper    |                   | -0.037       | -0.085   | -0.093     | -0.058             | -0.168            | -0.110                    |
|                        | Lower    |                   | -0.119       | -0.135   | -0.171     | -0.168             | -0.254            | -0.176                    |
|                        | N        |                   |              |          |            |                    |                   |                           |
| Information Sampling   | Estimate | 0                 | -0.046       | -0.044   | -0.042     | -0.040             | -0.069            | -0.061                    |
|                        | Upper    |                   | -0.003       | -0.017   | -0.001     | 0.017              | -0.024            | -0.028                    |
|                        | Lower    |                   | -0.089       | -0.071   | -0.083     | -0.097             | -0.114            | -0.094                    |
|                        | N        |                   |              |          |            |                    |                   |                           |
| 2D Mental Manipulation | Estimate | 0                 | 0.012        | -0.039   | -0.074     | -0.029             | -0.115            | -0.067                    |
|                        | Upper    |                   | 0.051        | -0.014   | -0.037     | 0.022              | -0.074            | -0.036                    |
|                        | Lower    |                   | -0.027       | -0.064   | -0.111     | -0.080             | -0.156            | -0.098                    |
|                        | N        |                   |              |          |            |                    |                   |                           |

|                                        | N        |   |        |        |        |        |        |        |  |
|----------------------------------------|----------|---|--------|--------|--------|--------|--------|--------|--|
| Delayed Memory                         | Estimate | 0 | -0.052 | -0.090 | -0.105 | -0.094 | -0.225 | -0.091 |  |
|                                        | Upper    |   | -0.009 | -0.063 | -0.064 | -0.037 | -0.180 | -0.056 |  |
|                                        | Lower    |   | -0.095 | -0.117 | -0.146 | -0.151 | -0.270 | -0.126 |  |
| Immediate Memory                       | Estimate | 0 | -0.047 | -0.079 | -0.090 | -0.083 | -0.220 | -0.089 |  |
|                                        | Upper    |   | -0.010 | -0.055 | -0.053 | -0.032 | -0.179 | -0.058 |  |
|                                        | Lower    |   | -0.084 | -0.103 | -0.127 | -0.134 | -0.261 | -0.120 |  |
| Spatial Working Memory<br>Maximum Span | Estimate | 0 | 0.014  | -0.048 | -0.096 | -0.037 | -0.115 | -0.060 |  |
|                                        | Upper    |   | 0.053  | -0.023 | -0.057 | 0.016  | -0.074 | -0.029 |  |
|                                        | Lower    |   | -0.025 | -0.073 | -0.135 | -0.090 | -0.156 | -0.091 |  |
| Verbal Analogical<br>Reasoning         | Estimate | 0 | -0.119 | -0.103 | -0.131 | -0.110 | -0.220 | -0.134 |  |
|                                        | Upper    |   | -0.078 | -0.078 | -0.092 | -0.055 | -0.177 | -0.101 |  |
|                                        | Lower    |   | -0.160 | -0.128 | -0.170 | -0.165 | -0.263 | -0.167 |  |
| Word Definitions                       | Estimate | 0 | -0.160 | -0.133 | -0.129 | -0.131 | -0.225 | -0.137 |  |
|                                        | Upper    |   | -0.119 | -0.106 | -0.088 | -0.076 | -0.182 | -0.104 |  |
|                                        | Lower    |   | -0.201 | -0.160 | -0.170 | -0.186 | -0.268 | -0.170 |  |

### c. Immediate Memory

In all 26050 participants who completed the first task but did not complete the whole battery

|              |          | Intercept | Original virus (ref) | Alpha  | Delta | Omicron | No hospital (ref) | ED     | Hospital admission | Intensive Care |
|--------------|----------|-----------|----------------------|--------|-------|---------|-------------------|--------|--------------------|----------------|
| Complete     | Estimate | 0.012     | 0                    | -0.010 | 0.034 | 0.080   | 0                 | -0.188 | -0.291             | -0.268         |
|              | Upper    |           |                      | 0.027  | 0.065 | 0.107   |                   | -0.110 | -0.203             | -0.135         |
|              | Lower    |           |                      | -0.047 | 0.003 | 0.053   |                   | -0.266 | -0.379             | -0.401         |
| Not complete | Estimate | -0.1955   | 0                    | 0.003  | 0.091 | 0.109   | 0                 | -0.154 | -0.171             | -0.214         |
|              | Upper    |           |                      | 0.076  | 0.150 | 0.163   |                   | -0.005 | 0.016              | 0.070          |
|              | Lower    |           |                      | -0.069 | 0.031 | 0.056   |                   | -0.303 | -0.358             | -0.499         |

### c continued

|              |          | No-Covid-19 (ref) | Asymptomatic | <4 weeks | 4-12 Weeks | >12 Weeks Resolved | >12 Weeks Ongoing |
|--------------|----------|-------------------|--------------|----------|------------|--------------------|-------------------|
| Complete     | Estimate | 0                 | -0.015       | -0.064   | -0.085     | -0.068             | -0.221            |
|              | Upper    |                   | 0.028        | -0.037   | -0.044     | -0.011             | -0.176            |
|              | Lower    |                   | -0.058       | -0.091   | -0.126     | -0.125             | -0.266            |
| Not complete | Estimate | 0                 | -0.119       | -0.114   | -0.098     | -0.139             | -0.254            |
|              | Upper    |                   | -0.038       | -0.061   | -0.016     | -0.026             | -0.157            |
|              | Lower    |                   | -0.200       | -0.167   | -0.180     | -0.253             | -0.351            |

**Table S15. Objectively measured correlates of recent subjective memory symptoms (poor memory), mean difference in task score (SD units)**

|                                           | Ongoing persistent cases |      | Mean difference | 95% CI |        |
|-------------------------------------------|--------------------------|------|-----------------|--------|--------|
|                                           | N                        | Freq |                 | Lower  | Upper  |
| Spatial Planning                          | 2580                     | 1216 | -0.067          | -0.145 | 0.011  |
| Information Sampling                      | 2580                     | 1216 | 0.018           | -0.060 | 0.096  |
| 2D Mental Manipulation                    | 2580                     | 1216 | -0.119          | -0.199 | -0.039 |
| Delayed Memory                            | 2580                     | 1216 | -0.180          | -0.258 | -0.102 |
| Immediate Memory                          | 2580                     | 1216 | -0.206          | -0.285 | -0.127 |
| Spatial Working Memory Maximum Span       | 2580                     | 1216 | -0.152          | -0.229 | -0.075 |
| Verbal Analogical Reasoning               | 2580                     | 1216 | -0.196          | -0.276 | -0.116 |
| Word Definitions                          | 2580                     | 1216 | -0.124          | -0.202 | -0.046 |
| Spatial Planning Response Time            | 2580                     | 1216 | -0.008          | -0.086 | 0.070  |
| Information Sampling Response Time        | 2580                     | 1216 | -0.031          | -0.103 | 0.041  |
| 2D Mental Manipulation Response Time      | 2576                     | 1216 | 0.050           | -0.031 | 0.131  |
| Delayed Memory Response Time              | 2463                     | 1216 | 0.103           | 0.020  | 0.186  |
| Immediate Memory Response Time            | 2580                     | 1216 | 0.205           | 0.128  | 0.282  |
| Spatial Working Memory Response Time      | 2578                     | 1216 | 0.071           | -0.007 | 0.149  |
| Verbal Analogical Reasoning Response Time | 2580                     | 1216 | 0.083           | 0.003  | 0.163  |
| Word Definitions Response Time            | 2580                     | 1216 | 0.142           | 0.062  | 0.222  |
| Delayed Memory Precision Errors           | 2580                     | 1216 | 0.164           | 0.087  | 0.241  |
| Delayed Memory Binding Errors             | 2580                     | 1216 | 0.049           | -0.029 | 0.127  |
| Delayed Memory Item Errors                | 2580                     | 1216 | 0.177           | 0.099  | 0.255  |
| Immediate Memory Precision Errors         | 2580                     | 1216 | 0.125           | 0.048  | 0.202  |
| Immediate Memory Binding Errors           | 2580                     | 1216 | 0.060           | -0.016 | 0.136  |
| Immediate Memory Item Errors              | 2580                     | 1216 | 0.187           | 0.109  | 0.265  |
| Information Sampling Mean Samples         | 2580                     | 1216 | -0.019          | -0.097 | 0.059  |
|                                           | Resolved cases           |      | Mean difference | 95% CI |        |
|                                           | N                        | Freq |                 | Lower  | Upper  |
| Spatial Planning                          | 53422                    | 9820 | -0.087          | -0.109 | -0.065 |
| Information Sampling                      | 53422                    | 9820 | -0.038          | -0.060 | -0.016 |
| 2D Mental Manipulation                    | 53422                    | 9820 | -0.067          | -0.089 | -0.045 |
| Delayed Memory                            | 53422                    | 9820 | -0.114          | -0.136 | -0.092 |
| Immediate Memory                          | 53422                    | 9820 | -0.122          | -0.144 | -0.100 |
| Spatial Working Memory Maximum Span       | 53422                    | 9820 | -0.107          | -0.129 | -0.085 |
| Verbal Analogical Reasoning               | 53422                    | 9820 | -0.143          | -0.165 | -0.121 |
| Word Definitions                          | 53422                    | 9820 | -0.109          | -0.131 | -0.087 |
| Spatial Planning Response Time            | 53422                    | 9820 | -0.006          | -0.028 | 0.016  |
| Information Sampling Response Time        | 53422                    | 9820 | -0.043          | -0.064 | -0.022 |
| 2D Mental Manipulation Response Time      | 53401                    | 9820 | 0.017           | -0.005 | 0.039  |
| Delayed Memory Response Time              | 51144                    | 9820 | 0.037           | 0.015  | 0.059  |



|                                           |       |      |        |        |       |
|-------------------------------------------|-------|------|--------|--------|-------|
| Immediate Memory Response Time            | 53422 | 9820 | 0.052  | 0.030  | 0.074 |
| Spatial Working Memory Response Time      | 53383 | 9820 | 0.007  | -0.013 | 0.027 |
| Verbal Analogical Reasoning Response Time | 53413 | 9820 | 0.055  | 0.033  | 0.077 |
| Word Definitions Response Time            | 53418 | 9820 | 0.108  | 0.086  | 0.130 |
| Delayed Memory Precision Errors           | 53422 | 9820 | 0.094  | 0.073  | 0.115 |
| Delayed Memory Binding Errors             | 53422 | 9820 | 0.027  | 0.006  | 0.048 |
| Delayed Memory Item Errors                | 53422 | 9820 | 0.106  | 0.084  | 0.128 |
| Immediate Memory Precision Errors         | 53422 | 9820 | 0.086  | 0.065  | 0.107 |
| Immediate Memory Binding Errors           | 53422 | 9820 | 0.050  | 0.028  | 0.072 |
| Immediate Memory Item Errors              | 53422 | 9820 | 0.113  | 0.091  | 0.135 |
| Information Sampling Mean Samples         | 53422 | 9820 | -0.018 | -0.039 | 0.003 |

|                                           | No-Covid-19 |      | Mean difference | 95% CI |        |
|-------------------------------------------|-------------|------|-----------------|--------|--------|
|                                           | N           | Freq |                 | Lower  | Upper  |
| Spatial Planning                          | 46261       | 6258 | -0.013          | -0.039 | 0.013  |
| Information Sampling                      | 46261       | 6258 | -0.019          | -0.046 | 0.008  |
| 2D Mental Manipulation                    | 46261       | 6258 | -0.055          | -0.082 | -0.028 |
| Delayed Memory                            | 46261       | 6258 | -0.050          | -0.076 | -0.024 |
| Immediate Memory                          | 46261       | 6258 | -0.062          | -0.089 | -0.035 |
| Spatial Working Memory Maximum Span       | 46261       | 6258 | -0.047          | -0.073 | -0.021 |
| Verbal Analogical Reasoning               | 46261       | 6258 | -0.041          | -0.067 | -0.015 |
| Word Definitions                          | 46261       | 6258 | -0.062          | -0.089 | -0.035 |
| Spatial Planning Response Time            | 46261       | 6258 | 0.031           | 0.004  | 0.058  |
| Information Sampling Response Time        | 46261       | 6258 | -0.031          | -0.058 | -0.004 |
| 2D Mental Manipulation Response Time      | 46250       | 6258 | 0.041           | 0.014  | 0.068  |
| Delayed Memory Response Time              | 44304       | 6258 | 0.043           | 0.016  | 0.070  |
| Immediate Memory Response Time            | 46261       | 6258 | 0.072           | 0.045  | 0.099  |
| Spatial Working Memory Response Time      | 46168       | 6258 | 0.021           | -0.006 | 0.048  |
| Verbal Analogical Reasoning Response Time | 46257       | 6258 | 0.081           | 0.054  | 0.108  |
| Word Definitions Response Time            | 46256       | 6258 | 0.074           | 0.048  | 0.100  |
| Delayed Memory Precision Errors           | 46261       | 6258 | 0.023           | -0.004 | 0.050  |
| Delayed Memory Binding Errors             | 46261       | 6258 | 0.027           | 0.000  | 0.054  |
| Delayed Memory Item Errors                | 46261       | 6258 | 0.050           | 0.023  | 0.077  |
| Immediate Memory Precision Errors         | 46261       | 6258 | 0.030           | 0.003  | 0.057  |
| Immediate Memory Binding Errors           | 46261       | 6258 | 0.021           | -0.005 | 0.047  |
| Immediate Memory Item Errors              | 46261       | 6258 | 0.057           | 0.030  | 0.084  |
| Information Sampling Mean Samples         | 46261       | 6258 | -0.007          | -0.034 | 0.020  |

Mean difference in task score between contrasted groups with 95% confidence interval in SD units.

**Table S16. Objectively measured correlates of subjective “brain fog”, mean difference in task score (SD units)**

|                                           | Ongoing persistent cases |       | Mean difference | 95% CI |        |
|-------------------------------------------|--------------------------|-------|-----------------|--------|--------|
|                                           | N                        | Freq  |                 | Lower  | Upper  |
| Spatial Planning                          | 2580                     | 1545  | -0.139          | -0.219 | -0.059 |
| Information Sampling                      | 2580                     | 1545  | -0.029          | -0.108 | 0.050  |
| 2D Mental Manipulation                    | 2580                     | 1545  | -0.094          | -0.176 | -0.012 |
| Delayed Memory                            | 2580                     | 1545  | -0.084          | -0.163 | -0.005 |
| Immediate Memory                          | 2580                     | 1545  | -0.161          | -0.241 | -0.081 |
| Spatial Working Memory Maximum Span       | 2580                     | 1545  | -0.187          | -0.266 | -0.108 |
| Verbal Analogical Reasoning               | 2580                     | 1545  | -0.164          | -0.246 | -0.082 |
| Word Definitions                          | 2580                     | 1545  | -0.049          | -0.129 | 0.031  |
| Spatial Planning Response Time            | 2580                     | 1545  | -0.019          | -0.096 | 0.058  |
| Information Sampling Response Time        | 2580                     | 1545  | -0.011          | -0.084 | 0.062  |
| 2D Mental Manipulation Response Time      | 2576                     | 1545  | 0.039           | -0.044 | 0.122  |
| Delayed Memory Response Time              | 2463                     | 1545  | 0.032           | -0.054 | 0.118  |
| Immediate Memory Response Time            | 2580                     | 1545  | 0.125           | 0.046  | 0.204  |
| Spatial Working Memory Response Time      | 2578                     | 1545  | 0.095           | 0.015  | 0.175  |
| Verbal Analogical Reasoning Response Time | 2580                     | 1545  | 0.044           | -0.037 | 0.125  |
| Word Definitions Response Time            | 2580                     | 1545  | 0.089           | 0.007  | 0.171  |
| Delayed Memory Precision Errors           | 2580                     | 1545  | 0.096           | 0.018  | 0.174  |
| Delayed Memory Binding Errors             | 2580                     | 1545  | 0.029           | -0.050 | 0.108  |
| Delayed Memory Item Errors                | 2580                     | 1545  | 0.079           | -0.001 | 0.159  |
| Immediate Memory Precision Errors         | 2580                     | 1545  | 0.108           | 0.029  | 0.187  |
| Immediate Memory Binding Errors           | 2580                     | 1545  | 0.055           | -0.022 | 0.132  |
| Immediate Memory Item Errors              | 2580                     | 1545  | 0.150           | 0.070  | 0.230  |
| Information Sampling Mean Samples         | 2580                     | 1545  | 0.026           | -0.056 | 0.108  |
|                                           | Resolved cases           |       | Mean difference | 95% CI |        |
|                                           | N                        | Freq  |                 | Lower  | Upper  |
| Spatial Planning                          | 53422                    | 12889 | -0.067          | -0.087 | -0.047 |
| Information Sampling                      | 53422                    | 12889 | -0.028          | -0.047 | -0.009 |
| 2D Mental Manipulation                    | 53422                    | 12889 | -0.068          | -0.088 | -0.048 |
| Delayed Memory                            | 53422                    | 12889 | -0.082          | -0.102 | -0.062 |
| Immediate Memory                          | 53422                    | 12889 | -0.088          | -0.108 | -0.068 |
| Spatial Working Memory Maximum Span       | 53422                    | 12889 | -0.108          | -0.128 | -0.088 |
| Verbal Analogical Reasoning               | 53422                    | 12889 | -0.094          | -0.114 | -0.074 |
| Word Definitions                          | 53422                    | 12889 | -0.060          | -0.080 | -0.040 |
| Spatial Planning Response Time            | 53422                    | 12889 | -0.019          | -0.039 | 0.001  |
| Information Sampling Response Time        | 53422                    | 12889 | -0.031          | -0.050 | -0.012 |

|                                           |               |             |                        |               |              |
|-------------------------------------------|---------------|-------------|------------------------|---------------|--------------|
| 2D Mental Manipulation Response Time      | 53401         | 12889       | 0.015                  | -0.005        | 0.035        |
| Delayed Memory Response Time              | 51144         | 12889       | 0.014                  | -0.007        | 0.035        |
| Immediate Memory Response Time            | 53422         | 12889       | 0.020                  | 0.001         | 0.039        |
| Spatial Working Memory Response Time      | 53383         | 12889       | -0.004                 | -0.026        | 0.018        |
| Verbal Analogical Reasoning Response Time | 53413         | 12889       | 0.015                  | -0.005        | 0.035        |
| Word Definitions Response Time            | 53418         | 12889       | 0.041                  | 0.021         | 0.061        |
| Delayed Memory Precision Errors           | 53422         | 12889       | 0.076                  | 0.057         | 0.095        |
| Delayed Memory Binding Errors             | 53422         | 12889       | 0.022                  | 0.002         | 0.042        |
| Delayed Memory Item Errors                | 53422         | 12889       | 0.076                  | 0.056         | 0.096        |
| Immediate Memory Precision Errors         | 53422         | 12889       | 0.079                  | 0.060         | 0.098        |
| Immediate Memory Binding Errors           | 53422         | 12889       | 0.032                  | 0.012         | 0.052        |
| Immediate Memory Item Errors              | 53422         | 12889       | 0.080                  | 0.060         | 0.100        |
| Information Sampling Mean Samples         | 53422         | 12889       | -0.010                 | -0.030        | 0.010        |
|                                           | <b>No-</b>    |             |                        |               |              |
|                                           | <b>Covid-</b> |             |                        |               |              |
|                                           | <b>19</b>     |             |                        |               |              |
|                                           | <b>N</b>      | <b>Freq</b> | <b>Mean difference</b> | <b>95% CI</b> |              |
|                                           |               |             |                        | <b>Lower</b>  | <b>Upper</b> |
| Spatial Planning                          | 46261         | 7890        | 0.007                  | -0.019        | 0.033        |
| Information Sampling                      | 46261         | 7890        | -0.015                 | -0.040        | 0.010        |
| 2D Mental Manipulation                    | 46261         | 7890        | -0.031                 | -0.055        | -0.007       |
| Delayed Memory                            | 46261         | 7890        | 0.005                  | -0.021        | 0.031        |
| Immediate Memory                          | 46261         | 7890        | -0.010                 | -0.033        | 0.013        |
| Spatial Working Memory Maximum Span       | 46261         | 7890        | -0.040                 | -0.064        | -0.016       |
| Verbal Analogical Reasoning               | 46261         | 7890        | -0.004                 | -0.027        | 0.019        |
| Word Definitions                          | 46261         | 7890        | 0.001                  | -0.032        | 0.034        |
| Spatial Planning Response Time            | 46261         | 7890        | 0.024                  | -0.001        | 0.049        |
| Information Sampling Response Time        | 46261         | 7890        | -0.018                 | -0.043        | 0.007        |
| 2D Mental Manipulation Response Time      | 46250         | 7890        | 0.033                  | 0.008         | 0.058        |
| Delayed Memory Response Time              | 44304         | 7890        | 0.043                  | 0.018         | 0.068        |
| Immediate Memory Response Time            | 46261         | 7890        | 0.047                  | 0.023         | 0.071        |
| Spatial Working Memory Response Time      | 46168         | 7890        | 0.024                  | -0.001        | 0.049        |
| Verbal Analogical Reasoning Response Time | 46257         | 7890        | 0.032                  | 0.008         | 0.056        |
| Word Definitions Response Time            | 46256         | 7890        | 0.012                  | -0.012        | 0.036        |
| Delayed Memory Precision Errors           | 46261         | 7890        | 0.005                  | -0.019        | 0.029        |
| Delayed Memory Binding Errors             | 46261         | 7890        | 0.016                  | -0.008        | 0.040        |
| Delayed Memory Item Errors                | 46261         | 7890        | -0.001                 | -0.018        | 0.016        |
| Immediate Memory Precision Errors         | 46261         | 7890        | 0.008                  | -0.016        | 0.032        |
| Immediate Memory Binding Errors           | 46261         | 7890        | 0.005                  | -0.022        | 0.032        |
| Immediate Memory Item Errors              | 46261         | 7890        | 0.011                  | -0.014        | 0.036        |
| Information Sampling Mean Samples         | 46261         | 7890        | -0.018                 | -0.044        | 0.008        |

Mean difference between contrasted groups with 95% confidence interval in SD units.

**Table S17. Contrasting global cognitive score (SD units) for presence vs absence of individual symptoms in resolved and persistent post-Covid cases**

a. Cognitive performance in relation to acute symptoms in all Covid-19 cases with recorded illness duration

|                                           | N     | Mean difference | 95% CI |        |
|-------------------------------------------|-------|-----------------|--------|--------|
| TOTAL                                     | 56002 |                 | Lower  | Upper  |
| Decrease in appetite                      | 19713 | -0.078          | -0.095 | -0.061 |
| Nausea and or vomiting                    | 6443  | -0.139          | -0.165 | -0.113 |
| Diarrhoea                                 | 6644  | -0.155          | -0.181 | -0.129 |
| Abdominal pain tummy ache                 | 5540  | -0.169          | -0.197 | -0.141 |
| Runny nose                                | 24992 | 0.029           | 0.012  | 0.046  |
| Sneezing                                  | 20170 | -0.011          | -0.028 | 0.006  |
| Blocked nose                              | 18266 | -0.008          | -0.027 | 0.011  |
| Sore eyes                                 | 9852  | -0.085          | -0.107 | -0.063 |
| Loss or change to sense of smell          | 16427 | -0.104          | -0.122 | -0.086 |
| Loss or change to sense of taste          | 17888 | -0.111          | -0.129 | -0.093 |
| Sore throat                               | 33485 | 0.025           | 0.008  | 0.042  |
| Hoarse voice                              | 12644 | -0.043          | -0.063 | -0.023 |
| Headache                                  | 37381 | -0.039          | -0.057 | -0.021 |
| Dizziness                                 | 13803 | -0.111          | -0.130 | -0.092 |
| Shortness of breath                       | 14655 | -0.109          | -0.128 | -0.090 |
| New persistent cough                      | 22305 | -0.030          | -0.047 | -0.013 |
| Tightness in chest                        | 11769 | -0.125          | -0.145 | -0.105 |
| Chest pain                                | 4656  | -0.243          | -0.273 | -0.213 |
| Fever (feeling too hot)                   | 24754 | -0.039          | -0.056 | -0.022 |
| Chills (feeling too cold)                 | 19254 | -0.060          | -0.077 | -0.043 |
| Difficulty sleeping                       | 16010 | -0.107          | -0.125 | -0.089 |
| Felt more tired than normal               | 39150 | 0.015           | -0.003 | 0.033  |
| Severe fatigue                            | 15427 | -0.127          | -0.146 | -0.108 |
| Numbness or tingling                      | 3261  | -0.262          | -0.297 | -0.227 |
| Feeling of heaviness in arms or legs      | 11583 | -0.081          | -0.101 | -0.061 |
| Achy muscles                              | 30415 | -0.064          | -0.081 | -0.047 |
| Raised red itchy areas on the skin        | 1403  | -0.222          | -0.275 | -0.169 |
| Sudden swelling of the face or lips       | 211   | -0.429          | -0.564 | -0.294 |
| Red purple sores or blisters on your feet | 332   | -0.257          | -0.365 | -0.149 |
| Leg swelling (Thrombosis)                 | 358   | -0.305          | -0.409 | -0.201 |

b. Cognitive performance in relation to recent symptoms (past 2 weeks) in all ongoing persistent cases

|                                        | N    | Mean difference | 95% CI |        |
|----------------------------------------|------|-----------------|--------|--------|
| TOTAL                                  | 2580 |                 | Lower  | Upper  |
| Fever                                  | 158  | -0.303          | -0.463 | -0.143 |
| Persistent cough                       | 498  | -0.043          | -0.140 | 0.054  |
| Shortness of breath                    | 893  | -0.169          | -0.250 | -0.088 |
| Chest pain tightness                   | 514  | -0.223          | -0.319 | -0.127 |
| Headache                               | 1322 | -0.109          | -0.186 | -0.032 |
| Dizziness                              | 739  | -0.247          | -0.332 | -0.162 |
| Mild fatigue                           | 1804 | 0.044           | -0.041 | 0.129  |
| Severe fatigue                         | 377  | -0.325          | -0.433 | -0.217 |
| Loss of appetite                       | 430  | -0.222          | -0.325 | -0.119 |
| Joint pain Aches                       | 1468 | -0.154          | -0.231 | -0.077 |
| Muscle pain Aches                      | 1303 | -0.123          | -0.200 | -0.046 |
| Brain fog                              | 1545 | -0.153          | -0.231 | -0.075 |
| Heart problems                         | 716  | -0.172          | -0.258 | -0.086 |
| Leg swelling                           | 200  | -0.048          | -0.192 | 0.096  |
| Swelling of face or lips               | 30   | -0.363          | -0.722 | -0.004 |
| Red or purples sores blisters on feet  | 42   | -0.179          | -0.482 | 0.124  |
| Numbness or tingling                   | 723  | -0.230          | -0.315 | -0.145 |
| Skin issues (itchy scaly redness rash) | 696  | -0.083          | -0.169 | 0.003  |
| Itchy eyes                             | 707  | -0.032          | -0.119 | 0.055  |
| Loss or change to sense of taste       | 515  | -0.161          | -0.257 | -0.065 |
| Loss or change to send of smell        | 591  | -0.104          | -0.195 | -0.013 |
| Vision issues                          | 463  | -0.148          | -0.248 | -0.048 |
| ringing in the ears (tinnitus)         | 763  | -0.052          | -0.137 | 0.033  |
| Hair loss                              | 298  | -0.191          | -0.311 | -0.071 |
| Difficulty sleeping                    | 1339 | -0.111          | -0.188 | -0.034 |
| Poor memory                            | 1216 | -0.223          | -0.300 | -0.146 |
| Mood swings                            | 682  | -0.210          | -0.297 | -0.123 |

|          |      |        |        |        |
|----------|------|--------|--------|--------|
| Anxiety  | 1042 | -0.184 | -0.262 | -0.106 |
| Low mood | 1021 | -0.118 | -0.197 | -0.039 |

Mean difference in global cognitive score between contrasted groups in SD units with 95% confidence interval.

**Table S18. Associations with global cognitive score (SD units) after excluding people who were vaccinated prior to their worst (longest duration) Covid-19 illness**

|                        | Estimate | 95% CI |        |
|------------------------|----------|--------|--------|
|                        |          | Upper  | Lower  |
| (Intercept)            | 0.120    | 0.024  | 0.216  |
| Original virus         | 0.005    | -0.034 | 0.043  |
| Alpha (ref)            | 0.000    |        |        |
| Delta                  | 0.058    | 0.016  | 0.100  |
| Omicron                | 0.146    | 0.111  | 0.181  |
| Unknown variant        | -0.106   | -0.201 | -0.011 |
| ED                     | -0.235   | -0.327 | -0.142 |
| Hospital admission     | -0.302   | -0.403 | -0.200 |
| Intensive care         | -0.274   | -0.423 | -0.125 |
| No-Covid-19 (ref)      | 0.000    |        |        |
| Asymptomatic           | -0.150   | -0.251 | -0.048 |
| <4 weeks               | -0.201   | -0.292 | -0.110 |
| 4-12 weeks             | -0.234   | -0.336 | -0.131 |
| >= 12 weeks resolved   | -0.209   | -0.320 | -0.099 |
| >= 12 weeks unresolved | -0.400   | -0.504 | -0.296 |

Sensitivity analysis rerunning the regression analysis with terms identified in the stepwise regression for people who were unvaccinated only produced similar parameter estimates to the main analysis.

**Table S19. Associations with global cognitive score (SD units) after excluding the No-Covid-19 group**

|                        | Estimate | 95% CI |        |
|------------------------|----------|--------|--------|
|                        |          | Lower  | Upper  |
| (Intercept)            | -0.082   | -0.116 | -0.048 |
| Original virus         | 0.012    | -0.026 | 0.049  |
| Alpha (ref)            | 0.000    |        |        |
| Delta                  | 0.066    | 0.032  | 0.099  |
| Omicron                | 0.118    | 0.088  | 0.149  |
| Unknown variant        | -0.100   | -0.195 | -0.006 |
| ED                     | -0.244   | -0.321 | -0.167 |
| Hospital admission     | -0.296   | -0.382 | -0.209 |
| Intensive care         | -0.339   | -0.470 | -0.208 |
| Asymptomatic(ref)      | 0.000    |        |        |
| <4 weeks               | -0.003   | -0.022 | 0.017  |
| 4-12 weeks             | -0.030   | -0.070 | 0.009  |
| >= 12 weeks resolved   | -0.018   | -0.076 | 0.040  |
| >= 12 weeks unresolved | -0.182   | -0.226 | -0.139 |

Sensitivity analysis rerunning the regression analysis with terms identified in the stepwise regression without the No-Covid-19 group produced similar parameter estimates to the main analysis.

**Table S20. Analysis of associations with global cognitive score (SD units) when including either people who did or did not report recent (in the past two weeks) cognitive symptoms (poor memory or “brain fog”)**

|                   | Reporting cognitive symptoms? |        |        |          |        |        |
|-------------------|-------------------------------|--------|--------|----------|--------|--------|
|                   | TRUE                          |        |        | FALSE    |        |        |
|                   | Estimate                      | 95%CI  |        | Estimate | 95%CI  |        |
|                   |                               | Lower  | Upper  |          | Lower  | Upper  |
| Intercept         | 0.042                         | -0.115 | 0.198  | 0.138    | -0.019 | 0.259  |
| Original virus    | 0.011                         | -0.052 | 0.075  | 0.014    | -0.050 | 0.061  |
| Alpha (ref)       | 0.000                         |        |        | 0.000    |        |        |
| Delta             | 0.047                         | -0.012 | 0.106  | 0.074    | 0.015  | 0.115  |
| Omicron           | 0.125                         | 0.070  | 0.179  | 0.119    | 0.065  | 0.157  |
| ED                | -0.313                        | -0.425 | -0.200 | -0.101   | -0.214 | 0.013  |
| Admitted          | -0.340                        | -0.460 | -0.220 | -0.220   | -0.340 | -0.083 |
| Intensive Care    | -0.407                        | -0.579 | -0.234 | -0.145   | -0.317 | 0.071  |
| No-Covid-19       | 0.000                         |        |        | 0.000    |        |        |
| Asymptomatic      | -0.134                        | -0.301 | 0.034  | -0.164   | -0.332 | -0.043 |
| <4 wks resolved   | -0.190                        | -0.338 | -0.042 | -0.201   | -0.349 | -0.085 |
| 4-12 weeks        | -0.232                        | -0.391 | -0.073 | -0.201   | -0.360 | -0.076 |
| >=12 resolved     | -0.212                        | -0.386 | -0.038 | -0.194   | -0.368 | -0.059 |
| >=12 not resolved | -0.352                        | -0.509 | -0.195 | -0.306   | -0.464 | -0.173 |

Sensitivity analysis rerunning the regression analysis with terms identified in the stepwise regression including either only those people who did report cognitive symptoms (poor memory or “brain fog”) in the past two weeks and only those people who did not.

**Table S21. Associations with global cognitive score (SD units) when excluding people where education level was unknown**

|                        | <b>Estimate</b> | <b>95%CI</b> |              |
|------------------------|-----------------|--------------|--------------|
|                        |                 | <b>Lower</b> | <b>Upper</b> |
| (Intercept)            | 0.135           | 0.009        | 0.262        |
| Original virus         | 0.013           | -0.036       | 0.062        |
| Alpha (ref)            | 0               |              |              |
| Delta                  | 0.015           | -0.063       | 0.092        |
| Omicron                | 0.049           | -0.030       | 0.127        |
| Unknown variant        | -0.113          | -0.239       | 0.013        |
| ED                     | -0.193          | -0.290       | -0.095       |
| Hospital admission     | -0.258          | -0.366       | -0.149       |
| Intensive care         | -0.403          | -0.570       | -0.235       |
| 1 Dose                 | -0.025          | -0.112       | 0.062        |
| 2 Doses                | 0.070           | -0.004       | 0.143        |
| No-Covid-19 (ref)      | 0.000           |              |              |
| Asymptomatic           | -0.176          | -0.304       | -0.049       |
| <4 weeks               | -0.233          | -0.353       | -0.112       |
| 4-12 weeks             | -0.247          | -0.376       | -0.118       |
| >= 12 weeks resolved   | -0.273          | -0.412       | -0.133       |
| >= 12 weeks unresolved | -0.397          | -0.528       | -0.265       |

Sensitivity analysis excluding participants (N=38,437) where education level was unknown in case this biased the normative model, produced marginally larger parameter estimates.



**Table S22. Associations with global cognitive score (SD units) when including suspected but unconfirmed Covid-19 as a separate group**

|                        | <b>Estimate</b> | <b>95%CI</b> |              |
|------------------------|-----------------|--------------|--------------|
|                        |                 | <b>Lower</b> | <b>Upper</b> |
| (Intercept)            | 0.115           | 0.020        | 0.210        |
| Original virus         | 0.011           | -0.027       | 0.048        |
| Alpha (ref)            | 0               |              |              |
| Delta                  | 0.066           | 0.032        | 0.100        |
| Omicron                | 0.124           | 0.094        | 0.155        |
| ED                     | -0.228          | -0.307       | -0.148       |
| Hospital admission     | -0.308          | -0.397       | -0.220       |
| Intensive care         | -0.330          | -0.463       | -0.198       |
| No-Covid-19(ref)       | 0               |              |              |
| Suspected              | -0.018          | -0.044       | 0.008        |
| Asymptomatic           | -0.154          | -0.250       | -0.057       |
| <4 weeks               | -0.204          | -0.294       | -0.113       |
| 4-12 weeks             | -0.230          | -0.327       | -0.132       |
| >= 12 weeks resolved   | -0.216          | -0.322       | -0.110       |
| >= 12 weeks unresolved | -0.381          | -0.481       | -0.282       |

Sensitivity analysis dividing the No-Covid-19 group into those participants (N=6,643) who suspected they might have had Covid-19 but this was not confirmed with a test, and the remainder who did not suspect that they had Covid-19.

## References

1. Office for National Statistics. Coronavirus (Covid-19) and the different effects on men and women in the UK, March 2020 to February 2021. 2021.
2. Pela G, Goldoni M, Solinas E, et al. Sex-Related Differences in Long-Covid-19 Syndrome. *J Womens Health (Larchmt)* 2022;31:620-30.
3. UK Government. Covid-19 confirmed deaths in England (to 31 December 2022): report. 2022.
4. Thompson EJ, Williams DM, Walker AJ, et al. Long Covid burden and risk factors in 10 UK longitudinal studies and electronic health records. *Nat Commun* 2022;13:3528.
5. Khunti K, Singh AK, Pareek M, Hanif W. Is ethnicity linked to incidence or outcomes of covid-19? *BMJ* 2020;369:m1548.
6. Irizar P, Pan D, Kapadia D, et al. Ethnic inequalities in Covid-19 infection, hospitalisation, intensive care admission, and death: a global systematic review and meta-analysis of over 200 million study participants. *EClinicalMedicine* 2023;57:101877.
7. O'Dowd A. Covid-19: People in most deprived areas of England and Wales twice as likely to die. *BMJ* 2020;369:m2389.
8. Mahase E. Covid-19: Adults in poorest areas are almost four times more likely to die, inquiry finds. *BMJ* 2021;374:n1728.
9. Danielsen AC, Lee KM, Boulicault M, et al. Sex disparities in Covid-19 outcomes in the United States: Quantifying and contextualizing variation. *Soc Sci Med* 2022;294:114716.
