# Supplementary material
Source: PubMed Central journal article supplement (PMC11156187)
Supplement: NEJMoa2311330_data-sharing.pdf [file NEJMoa2311330_data-sharing.pdf]

## Data Sharing Statement

Hampshire A, Azor A, Atchison C, et al. Cognition and Memory after Covid-19 in a Large Community Sample. N Engl J Med. DOI: 10.1056/NEJMoa2311330.

| Question                                                            | Authors' Response                                                                                                                                                                                                                                  |
|---------------------------------------------------------------------|----------------------------------------------------------------------------------------------------------------------------------------------------------------------------------------------------------------------------------------------------|
| Will the data collected for your study be made available to others? | Yes                                                                                                                                                                                                                                                |
| Would you like to offer context for your decision?                  | —                                                                                                                                                                                                                                                  |
| Which data?                                                         | De-identified dataset as used in reported analyses                                                                                                                                                                                                 |
| Additional information about data                                   | —                                                                                                                                                                                                                                                  |
| How or where can the data be obtained?                              | Applications should be addressed to p.elliott@imperial.ac.uk, complete the data access request form, which must be approved by the REACT Data Access Committee prior to a data transfer agreement being put in place with Imperial College London. |
| When will data availability begin?                                  | With publication                                                                                                                                                                                                                                   |
| When will data availability end?                                    | NA                                                                                                                                                                                                                                                 |
| Will any supporting documents be available?                         | Yes                                                                                                                                                                                                                                                |
| Which supporting documents?                                         | Statistical analysis plan                                                                                                                                                                                                                          |
| Additional information about supporting documents                   | —                                                                                                                                                                                                                                                  |
| How or where can supporting documents be obtained?                  | Online as a supplemental appendix at NEJM                                                                                                                                                                                                          |
| When will supporting documents availability begin?                  | Beginning Date: With publication                                                                                                                                                                                                                   |
| When will supporting documents availability end?                    | End Date: NA                                                                                                                                                                                                                                       |
| To whom will data be available?                                     | Bonafide researchers from academic institutions whose proposed use of the data has been approved by the REACT Data Access Committee (RDAC)                                                                                                         |
| For what type of analysis or purpose?                               | For evaluating the published results and extending the analyses for research purposes as approved by the RDAC and in keeping with the participant consents                                                                                         |
| By what mechanism?                                                  | With a signed and approved data transfer agreement from Imperial College London                                                                                                                                                                    |
| Any other restrictions?                                             | No                                                                                                                                                                                                                                                 |
| Additional information                                              | —                                                                                                                                                                                                                                                  |

This statement was posted on February 29, 2024, at NEJM.org.
