# Supplementary material
Source: PubMed Central journal article supplement (PMC11156187)
Supplement: NEJMoa2311330_disclosures.pdf [file NEJMoa2311330_disclosures.pdf]

Christina Atchison

**Discloser Identifier:** 952619

**Disclosure Purpose:** 23-11330

## Summary of Interests

I do not have any interests to disclose at this time.

## Additional Questions

1. **Are there other relationships or activities that readers could perceive to have influenced, or that give the appearance of potentially influencing, what you wrote in the submitted work?**

No.

2. **What is the manuscript title?**

Cognition and Memory Following COVID-19 in a Large Random Community Sample

3. **Are you the corresponding author?**

No.

## Certification

I certify that the information provided in this disclosure is complete and accurate.

Adriana Azor

**Discloser Identifier:** 1153543

**Disclosure Purpose:** 23-11330

## Summary of Interests

I do not have any interests to disclose at this time.

## Additional Questions

1. **Are there other relationships or activities that readers could perceive to have influenced, or that give the appearance of potentially influencing, what you wrote in the submitted work?**

No.

2. **What is the manuscript title?**

Cognition and Memory Following COVID-19 in a Large Random Community Sample

3. **Are you the corresponding author?**

No.

## Certification

I certify that the information provided in this disclosure is complete and accurate.

Marc Chadeau-Hyam

Discloser Identifier: 603105

Disclosure Purpose: 23-11330

## Summary of Interests

### Company or Organization

| Entity                                                                                                                                                                                                                     | Type                     | Interest Held By |
|----------------------------------------------------------------------------------------------------------------------------------------------------------------------------------------------------------------------------|--------------------------|------------------|
| O-SMOSE                                                                                                                                                                                                                    | Other Business Ownership | Self             |
| <b>Form of Business Description:</b> I hold 49% shares of the OSMOSE, which is a consultancy company.<br><b>Additional Information:</b> This consultancy activities of the cpmany are totally independent from my research |                          |                  |

## Additional Questions

1. **Are there other relationships or activities that readers could perceive to have influenced, or that give the appearance of potentially influencing, what you wrote in the submitted work?**

No.

2. **What is the manuscript title?**

Cognition and Memory Following COVID-19 in a Large Random Community Sample

3. **Are you the corresponding author?**

No.

## Certification

I certify that the information provided in this disclosure is complete and accurate.

Graham Cooke

**Discloser Identifier:** 651920

**Disclosure Purpose:** 23-11330

## Summary of Interests

I do not have any interests to disclose at this time.

## Additional Questions

1. **Are there other relationships or activities that readers could perceive to have influenced, or that give the appearance of potentially influencing, what you wrote in the submitted work?**

No.

2. **What is the manuscript title?**

Cognition and Memory Following COVID-19 in a Large Random Community Sample

3. **Are you the corresponding author?**

No.

## Certification

I certify that the information provided in this disclosure is complete and accurate.

Emily Cooper

**Discloser Identifier:** 1153545

**Disclosure Purpose:** 23-11330

## Summary of Interests

I do not have any interests to disclose at this time.

## Additional Questions

1. **Are there other relationships or activities that readers could perceive to have influenced, or that give the appearance of potentially influencing, what you wrote in the submitted work?**

No.

2. **What is the manuscript title?**

Cognition and Memory Following COVID-19 in a Large Random Community Sample

3. **Are you the corresponding author?**

No.

## Certification

I certify that the information provided in this disclosure is complete and accurate.

Christl Donnelly

Discloser Identifier: 1063869

Disclosure Purpose: 23-11330

## Summary of Interests

### Company or Organization

| Entity                                                                                                                                                                                                                                                                                                                          | Type  | Interest Held By |
|---------------------------------------------------------------------------------------------------------------------------------------------------------------------------------------------------------------------------------------------------------------------------------------------------------------------------------|-------|------------------|
| National Institute of Health and Care Research                                                                                                                                                                                                                                                                                  | Other | Self             |
| <b>Category:</b> Other<br><b>Description:</b> Grant funding of the Health Protection Research Unit in Emerging and Zoonotic Infections. This is led by University of Liverpool with University of Oxford being a partner institution.<br><b>Additional Information:</b> I am the theme lead for Epidemiology and Risk Analysis. |       |                  |

## Additional Questions

1. **Are there other relationships or activities that readers could perceive to have influenced, or that give the appearance of potentially influencing, what you wrote in the submitted work?**

No.

2. **What is the manuscript title?**

Cognition and Memory Following COVID-19 in a Large Random Community Sample

3. **Are you the corresponding author?**

No.

## Certification

I certify that the information provided in this disclosure is complete and accurate.

**Discloser Identifier:** 358314

**Disclosure Purpose:** 23-11330

## Summary of Interests

### Company or Organization

| Entity                                                                                                                                                                                                                                                                                                                               | Type             | Interest Held By |
|--------------------------------------------------------------------------------------------------------------------------------------------------------------------------------------------------------------------------------------------------------------------------------------------------------------------------------------|------------------|------------------|
| National Institute for Health Research                                                                                                                                                                                                                                                                                               | Grant / Contract | Self             |
| <b>Recipient Name:</b> Imperial College London<br><b>Grant / Contract Description:</b> REACT-LC study - REACT-Long COVID (NIHR COV-LT-0040)<br><b>Additional Information:</b> Principal investigator<br><b>Recipient Type:</b> Institution<br><b>Grant / Contract Purpose:</b> Research                                              |                  |                  |
| UK Department of Health and Social Security                                                                                                                                                                                                                                                                                          | Grant / Contract | Self             |
| <b>Recipient Name:</b> Imperial College London<br><b>Grant / Contract Description:</b> Real-time Assessment of Community Transmission - REACT Study<br><b>Additional Information:</b> Principal investigator<br><b>Recipient Type:</b> Institution<br><b>Grant / Contract Purpose:</b> Research                                      |                  |                  |
| UKRI Medical Research Council                                                                                                                                                                                                                                                                                                        | Grant / Contract | Self             |
| <b>Recipient Name:</b> Imperial College London<br><b>Grant / Contract Description:</b> REACT-GE study - REACT Genomics England (MR/V030841/1)<br><b>Additional Information:</b> Principal investigator<br><b>Recipient Type:</b> Institution<br><b>Grant / Contract Purpose:</b> Research                                            |                  |                  |
| UKRI Medical Research Council                                                                                                                                                                                                                                                                                                        | Grant / Contract | Self             |
| <b>Recipient Name:</b> Imperial College London<br><b>Grant / Contract Description:</b> MRC Centre for Environment and Health - programme grant (MR/S019669/1)<br><b>Additional Information:</b> Director of MRC Centre for Environment and Health<br><b>Recipient Type:</b> Institution<br><b>Grant / Contract Purpose:</b> Research |                  |                  |

## Additional Questions

1. Are there other relationships or activities that readers could perceive to have influenced, or that give the appearance of potentially influencing, what you wrote in the submitted work?

No.

2. What is the manuscript title?

Cognition and Memory Following COVID-19 in a Large Random Community Sample .

3. Are you the corresponding author?

No.

## Certification

I certify that the information provided in this disclosure is complete and accurate.

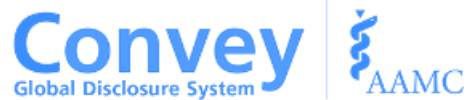



Valentina Giunchiglia

**Discloser Identifier:** 1153544

**Disclosure Purpose:** 23-11330

## Summary of Interests

I do not have any interests to disclose at this time.

## Additional Questions

1. **Are there other relationships or activities that readers could perceive to have influenced, or that give the appearance of potentially influencing, what you wrote in the submitted work?**

No.

2. **What is the manuscript title?**

Cognition and Memory Following COVID-19 in a Large Random Community Sample

3. **Are you the corresponding author?**

No.

## Certification

I certify that the information provided in this disclosure is complete and accurate.

Discloser Identifier: 797757

Disclosure Purpose: 23-11330

## Summary of Interests

### Company or Organization

| Entity                                                                                                                                                                                                                                                 | Type                     | Interest Held By |
|--------------------------------------------------------------------------------------------------------------------------------------------------------------------------------------------------------------------------------------------------------|--------------------------|------------------|
| Future Cognition Ltd                                                                                                                                                                                                                                   | Other Business Ownership | Self             |
| <b>Form of Business Description:</b> Future Cognition develops custom cognitive assessment software for third parties, primarily in the university sector.<br><b>Additional Information:</b> Founder, owner and director.                              |                          |                  |
| H2 Cognitive Designs Ltd.                                                                                                                                                                                                                              | Other Business Ownership | Self             |
| <b>Form of Business Description:</b> H2 Cognitive Designs provides online assessment technology, primarily to the university, healthcare and pharmaceutical research sectors.<br><b>Additional Information:</b> Co-founder, 50% owner and co-director. |                          |                  |

## Additional Questions

1. **Are there other relationships or activities that readers could perceive to have influenced, or that give the appearance of potentially influencing, what you wrote in the submitted work?**

No.

2. **What is the manuscript title?**

Cognition and memory following COVID-19 in a large community sample

3. **Are you the corresponding author?**

Yes.

a. **Please list the other authors' names here.**

Adriana Azor Christina Atchison William Trender Peter J Hellyer, Valentina Giunchiglia Masud Husain Graham S Cooke Emily Cooper Adam Lound Christl A. Donnelly Marc Chadeau-Hyam Helen Ward Paul Elliott

## Certification

I certify that the information provided in this disclosure is complete and accurate.

Peter Hellyer

Discloser Identifier: 954266

Disclosure Purpose: 23-11330

## Summary of Interests

### Company or Organization

| Entity                                | Type       | Interest Held By                                                                                                                                                                         |
|---------------------------------------|------------|------------------------------------------------------------------------------------------------------------------------------------------------------------------------------------------|
| H2 Cognitive Designs LTD              | Employment | Self                                                                                                                                                                                     |
| <b>Title:</b> Chief Executive Officer |            | <b>Position Description:</b> Chief Executive Officer of H2 Cognitive Designs LTD, which markets the 'Cognitron' platform, used to perform the cognitive tests in the current manuscript. |
| <b>Additional Information:</b>        |            |                                                                                                                                                                                          |
| H2 Cognitive Designs LTD              | Stock      | Self                                                                                                                                                                                     |
| <b>Additional Information:</b>        |            |                                                                                                                                                                                          |

## Additional Questions

1. **Are there other relationships or activities that readers could perceive to have influenced, or that give the appearance of potentially influencing, what you wrote in the submitted work?**

No.

2. **What is the manuscript title?**

Cognition and Memory Following COVID-19 in a Large Random Community Sample" to the New England Journal of Medicine

3. **Are you the corresponding author?**

No.

## Certification

I certify that the information provided in this disclosure is complete and accurate.

Masud Husain

Discloser Identifier: 996066

Disclosure Purpose: 23-11330

## Summary of Interests

### Company or Organization

| Entity                                                                                                                                                     | Type             | Interest Held By                                                               |
|------------------------------------------------------------------------------------------------------------------------------------------------------------|------------------|--------------------------------------------------------------------------------|
| Wellcome Trust                                                                                                                                             | Grant / Contract | Self                                                                           |
| <b>Recipient Name:</b> Masud Husain<br><b>Grant / Contract Description:</b> Wellcome Trust Principal Research Fellowship<br><b>Additional Information:</b> |                  | <b>Recipient Type:</b> Individual<br><b>Grant / Contract Purpose:</b> Research |

## Additional Questions

1. **Are there other relationships or activities that readers could perceive to have influenced, or that give the appearance of potentially influencing, what you wrote in the submitted work?**

No.

2. **What is the manuscript title?**

Cognition and Memory Following COVID-19 in a Large Random Community Sample

3. **Are you the corresponding author?**

No.

## Certification

I certify that the information provided in this disclosure is complete and accurate.

Adam Lound

**Discloser Identifier:** 1153546

**Disclosure Purpose:** 23-11330

## Summary of Interests

I do not have any interests to disclose at this time.

## Additional Questions

1. **Are there other relationships or activities that readers could perceive to have influenced, or that give the appearance of potentially influencing, what you wrote in the submitted work?**

No.

2. **What is the manuscript title?**

Cognition and Memory Following COVID-19 in a Large Random Community Sample

3. **Are you the corresponding author?**

No.

## Certification

I certify that the information provided in this disclosure is complete and accurate.

William Trender

Discloser Identifier: 954273

Disclosure Purpose: 23-11330

## Summary of Interests

### Company or Organization

| Entity                                                                 | Type                                                                                                                                                                                                                                                                         | Interest Held By |
|------------------------------------------------------------------------|------------------------------------------------------------------------------------------------------------------------------------------------------------------------------------------------------------------------------------------------------------------------------|------------------|
| H2 COGNITIVE DESIGNS LTD                                               | Employment                                                                                                                                                                                                                                                                   | Self             |
| <b>Title:</b> SOFTWARE DEVELOPER<br><br><b>Additional Information:</b> | <b>Position Description:</b> • Assisting with the development of task and questionnaire frameworks in JavaScript ES6 • Assisting with the development of backend server software using Python • Assisting in the development of mobile applications using Cordova and Kotlin |                  |

## Additional Questions

1. **Are there other relationships or activities that readers could perceive to have influenced, or that give the appearance of potentially influencing, what you wrote in the submitted work?**

No.

2. **What is the manuscript title?**

Cognition and Memory Following COVID-19 in a Large Random Community Sample

3. **Are you the corresponding author?**

No.

## Certification

I certify that the information provided in this disclosure is complete and accurate.

Helen Ward

**Discloser Identifier:** 952620

**Disclosure Purpose:** 23-11330

## Summary of Interests

I do not have any interests to disclose at this time.

## Additional Questions

1. **Are there other relationships or activities that readers could perceive to have influenced, or that give the appearance of potentially influencing, what you wrote in the submitted work?**

No.

2. **What is the manuscript title?**

Cognition and Memory Following COVID-19 in a Large Random Community Sample

3. **Are you the corresponding author?**

No.

## Certification

I certify that the information provided in this disclosure is complete and accurate.
